# Supplementary material for: Leaf-litter-associated fungi from South Africa to control fungal plant pathogens
Source: Research Square preprint supplement (doi:10.21203/rs.3.rs-6347827/v1), 2025-04-30
Supplement: Supplementary file 1 [file 7707263162370c84f146e256.docx]

**Supplementary Information**

**Leaf-litter-associated fungi from South Africa to control fungal plant pathogens**

Rachel Serrano*, Víctor González-Menéndez, Ignacio Pérez-Victoria, Isabel Sánchez, Clara Toro, Thomas A. Mackenzie, Jesús Martín, José R. Tormo, Olga Genilloud.

Fundación MEDINA, Avda. del conocimiento 34, 18016, Granada, Spain.

*Correspondence to rachel.serrano@medinaandalucia.es

**Table S1.** List of 232 fungal strains included in the phylogenetic analysis (possible new species are in bold).

| Name | Genus | Species | Family | Order | Class | Sequence | %  Similarity | GenBank No. of the highest score |
| --- | --- | --- | --- | --- | --- | --- | --- | --- |
| **CF-166111** | ***Acrospermum*** | **sp.** | ***Acrospermaceae*** | ***Acrospermales*** | ***Dothideomycetes*** | **ITS** | **95** | **MK562005.1** |
| CF-166079 | *Bezerromyces* | sp. | *Bezerromycetaceae* | *Bezerromycetales* | *Dothideomycetes* | ITS | 96 | NR_173042.1 |
| CF-166185 | *Botryobambusa* | sp. | *Botryosphaeriaceae* | *Botryosphaeriales* | *Dothideomycetes* | 28S | 98 | JX646809.1 |
| CF-164395 | *Dothiora* | *ceratoniae* | *Botryosphaeriaceae* | *Botryosphaeriales* | *Dothideomycetes* | ITS | 99 | KU728500.1 |
| CF-164488 | *Dothiora* | *coronillae* | *Botryosphaeriaceae* | *Botryosphaeriales* | *Dothideomycetes* | ITS | 100 | NR_157481.1 |
| CF-164362 | *Dothiora* | *maculans* | *Botryosphaeriaceae* | *Botryosphaeriales* | *Dothideomycetes* | ITS | 100 | MH860981.1 |
| CF-164411 | *Dothiora* | *oleae* | *Botryosphaeriaceae* | *Botryosphaeriales* | *Dothideomycetes* | ITS | 99 | KU728509.1 |
| CF-164402 | *Dothiora* | *oleae* | *Botryosphaeriaceae* | *Botryosphaeriales* | *Dothideomycetes* | ITS | 100 | KU728509.1 |
| CF-164234 | *Neofusicoccum* | *protearum* | *Botryosphaeriaceae* | *Botryosphaeriales* | *Dothideomycetes* | ITS | 100 | FJ150698.1 |
| CF-164296 | *Cladosporium* | sp. | *Cladosporiaceae* | *Capnodiales* | *Dothideomycetes* | ITS | 100 | MF473180.1/OR243761.1 |
| CF-164449 | *Verrucocladosporium* | *carpobroti* | *Cladosporiaceae* | *Capnodiales* | *Dothideomycetes* | ITS | 100 | MW175354.1 |
| CF-164382 | *Dothidea* | *eucalypti* | *Dothideaceae* | *Dothideales* | *Dothideomycetes* | ITS | 99 | NR_156390.1 |
| CF-164419 | *Hysterium* | *pulicare* | *Hysteriaceae* | *Hysteriales* | *Dothideomycetes* | ITS+28S | 100 | EU552137 |
| CF-164367 | *Austroafricana* | *parva* | *Teratosphaeriaceae* | *Mycosphaerellales* | *Dothideomycetes* | 28S | 100 | EU707874.1 |
| CF-164249 | *Austroafricana* | *parva* | *Teratosphaeriaceae* | *Mycosphaerellales* | *Dothideomycetes* | ITS+28S | 100 | EU707874.1 |
| CF-164238 | *Austroafricana* | *parva* | *Teratosphaeriaceae* | *Mycosphaerellales* | *Dothideomycetes* | ITS+28S | 100 | EU707874.1 |
| CF-164355 | *Neocatenulostroma* | *microsporum* | *Teratosphaeriaceae* | *Mycosphaerellales* | *Dothideomycetes* | ITS+28s | 100 | EU167572.1 |
| CF-166084 | *Neophaeothecoidea* | *protea* | *Teratosphaeriaceae* | *Mycosphaerellales* | *Dothideomycetes* | ITS | 99 | NR_157417.1 |
| CF-169044 | *Parateratosphaeria* | *bellula* | *Teratosphaeriaceae* | *Mycosphaerellales* | *Dothideomycetes* | ITS+28S | 99 | EU019301.2 |
| **CF-169033** | ***Alfoldia*** | **sp.** | ***Amorosiaceae*** | ***Pleosporales*** | ***Dothideomycetes*** | **ITS** | **95** | **NR_171211.1** |
| **CF-168984** | ***Alfoldia*** | **sp.** | ***Amorosiaceae*** | ***Pleosporales*** | ***Dothideomycetes*** | **ITS** | **95** | **NR_171211.1** |
| CF-164330 | *Angustimassarina* | sp. | *Amorosiaceae* | *Pleosporales* | *Dothideomycetes* | ITS | 100 | KY548099.1 |
| **CF-164349** | ***Anteaglonium*** | **sp.** | ***Anteagloniaceae*** | ***Pleosporales*** | ***Dothideomycetes*** | **28S** | **100** | **GQ221876.1** |
| **CF-164342** | ***Anteaglonium*** | **sp.** | ***Anteagloniaceae*** | ***Pleosporales*** | ***Dothideomycetes*** | **28S** | **97** | **MH866969.1** |
| **CF-164236** | ***Flammeascoma*** | **sp.** | ***Anteagloniaceae*** | ***Pleosporales*** | ***Dothideomycetes*** | **ITS** | **99** | **MN598923.1** |
| **CF-164471** | ***Coniothyrium*** | **sp.** | ***Coniothyriaceae*** | ***Pleosporales*** | ***Dothideomycetes*** | **ITS** | **96** | **OP597892.1** |
| CF-164281 | *Neoconiothyrium* | sp. | *Coniothyriaceae* | *Pleosporales* | *Dothideomycetes* | ITS | 96 | MH858605.1 |
| **CF-164273** | ***Cryptocoryneum*** | **sp.** | ***Cryptocoryneaceae*** | ***Pleosporales*** | ***Dothideomycetes*** | **ITS** | **93** | **NR_153938.1** |
| **CF-164341** | ***Cryptocoryneum*** | **sp.** | ***Cryptocoryneaceae*** | ***Pleosporales*** | ***Dothideomycetes*** | **ITS** | **95** | **NR_153935.1** |
| CF-166041 | *Pyrenochaeta* | *pinicola* | *Cucurbitariaceae* | *Pleosporales* | *Dothideomycetes* | ITS | 99 | KJ869152.1 |
| CF-166077 | *Pyrenochaeta* | sp. | *Cucurbitariaceae* | *Pleosporales* | *Dothideomycetes* | ITS | 96 | NR_155692.1 |
| **CF-164283** | ***Pyrenochaeta*** | **sp.** | ***Cucurbitariaceae*** | ***Pleosporales*** | ***Dothideomycetes*** | **ITS** | **100** | **UDB05787168** |
| CF-164479 | *Pyrenochaetopsis* | *leptospora* | *Cucurbitariaceae* | *Pleosporales* | *Dothideomycetes* | ITS+28S | 100 | MF785793.1 |
| CF-164284 | *Pyrenochaetopsis* | *leptospora* | *Cucurbitariaceae* | *Pleosporales* | *Dothideomycetes* | ITS+28S | 100 | MF785793.1 |
| CF-164269 | *Pyrenochaetopsis* | *leptospora* | *Cucurbitariaceae* | *Pleosporales* | *Dothideomycetes* | ITS+28S | 100 | MF785793.1 |
| CF-166135 | *Pyricularia* | *caricis* | *Cucurbitariaceae* | *Pleosporales* | *Dothideomycetes* | ITS | 100 | MK432729.1 |
| CF-164461 | *Delitschia* | *chaetomioides* | *Delitschiaceae* | *Pleosporales* | *Dothideomycetes* | 28S | 99 | MK347981.1 |
| **CF-166157** | ***Ascochyta*** | **sp** | ***Didymellaceae*** | ***Pleosporales*** | ***Dothideomycetes*** | **ITS** | **99** | **MG065764.1** |
| CF-166125 | *Ascochyta* | sp. | *Didymellaceae* | *Pleosporales* | *Dothideomycetes* | ITS+28S | 98 | EU167557.1/EU167559.1 |
| CF-164482 | *Ascochyta* | sp. | *Didymellaceae* | *Pleosporales* | *Dothideomycetes* | ITS+28S | 99 | EU167575.1 |
| CF-164486 | *Boeremia* | *exigua* | *Didymellaceae* | *Pleosporales* | *Dothideomycetes* | ITS+28S | 100 | EU167567.1 |
| CF-164354 | *Coniothyrium* | sp. | *Didymellaceae* | *Pleosporales* | *Dothideomycetes* | ITS | 97 | OP179019.1 |
| CF-166148 | *Didymella* | *pinodella* | *Didymellaceae* | *Pleosporales* | *Dothideomycetes* | ITS+28S | 99 | EU167565.1 |
| CF-166147 | *Didymella* | *pinodella* | *Didymellaceae* | *Pleosporales* | *Dothideomycetes* | ITS+28S | 99 | EU167565.1 |
| CF-164271 | *Didymella* | *pinodella* | *Didymellaceae* | *Pleosporales* | *Dothideomycetes* | ITS+28S | 99 | EU167565.1 |
| CF-164380 | *Microphaeropsis* | *proteae* | *Didymellaceae* | *Pleosporales* | *Dothideomycetes* | ITS | 99 | JN712495.1 |
| CF-166120 | *Neodidymelliopsis* | sp. | *Didymellaceae* | *Pleosporales* | *Dothideomycetes* | ITS+28S | 100 | MG065745.1 |
| **CF-164320** | ***Ophiobolus*** | **sp.** | ***Didymellaceae*** | ***Pleosporales*** | ***Dothideomycetes*** | **ITS** | **94** | **OM337541.1** |
| **CF-168996** | ***Phoma*** | **sp.** | ***Didymellaceae*** | ***Pleosporales*** | ***Dothideomycetes*** | **ITS** | **93** | **KY484798.1** |
| CF-166102 | *Phomatodes* | *nebulosa* | *Didymellaceae* | *Pleosporales* | *Dothideomycetes* | ITS+28S | 99 | EU552151.1 |
| CF-164387 | *Phomatodes* | *nebulosa* | *Didymellaceae* | *Pleosporales* | *Dothideomycetes* | ITS+28S | 99 | EU552151.1 |
| CF-164386 | *Phomatodes* | *nebulosa* | *Didymellaceae* | *Pleosporales* | *Dothideomycetes* | ITS+28S | 99 | EU552151.1 |
| CF-164279 | *Phomatodes* | *nebulosa* | *Didymellaceae* | *Pleosporales* | *Dothideomycetes* | ITS+28S | 100 | EU552151.1 |
| CF-166178 | *Pseudoascochyta* | sp. | *Didymellaceae* | *Pleosporales* | *Dothideomycetes* | ITS | 99 | NR_158274.1/NR_158273.1 |
| CF-169051 | *Chromolaenicola* | sp. | *Didymosphaeriaceae* | *Pleosporales* | *Dothideomycetes* | ITS | 99 | MT310601.1 |
| CF-164447 | *Chromolaenicola* | sp. | *Didymosphaeriaceae* | *Pleosporales* | *Dothideomycetes* | ITS | 99 | MT310601.1 |
| CF-164439 | *Didymosphaeria* | *variabile* | *Didymosphaeriaceae* | *Pleosporales* | *Dothideomycetes* | ITS+28S | 100 | JX496118.1 |
| CF-166042 | *Paracamarosporium* | *leucadendri* | *Didymosphaeriaceae* | *Pleosporales* | *Dothideomycetes* | ITS+28S | 100 | EU552106.1 |
| CF-166142 | *Paraconiothyrium* | *brasiliense* | *Didymosphaeriaceae* | *Pleosporales* | *Dothideomycetes* | ITS | 99 | JX496083.1 |
| CF-164287 | *Paraphaeosphaeria* | *parmeliae* | *Didymosphaeriaceae* | *Pleosporales* | *Dothideomycetes* | ITS | 100 | NR_137955.1 |
| CF-164274 | *Paraphaeosphaeria* | *verruculosa* | *Didymosphaeriaceae* | *Pleosporales* | *Dothideomycetes* | ITS | 100 | NR_137955.1 |
| CF-164383 | *Pseudocamarosporium* | *brabeji* | *Didymosphaeriaceae* | *Pleosporales* | *Dothideomycetes* | ITS+28S | 99 | EU552105.1 |
| **CF-164282** | ***Fuscostagonospora*** | **sp.** | ***Fuscostagonosporaceae*** | ***Pleosporales*** | ***Dothideomycetes*** | **ITS** | **93** | **NR_153964.1** |
| **CF-166162** | ***Fuscostagonospora*** | **sp.** | ***Fuscostagonosporaceae*** | ***Pleosporales*** | ***Dothideomycetes*** | **ITS** | **93** | **NR_163359.1** |
| CF-166181 | *Keissleriella* | sp. | *Lentitheciaceae* | *Pleosporales* | *Dothideomycetes* | ITS | 98 | KJ869112.1/NR_171713.1 |
| CF-166029 | *Leptosphaeria* | *proteicola* | *Leptosphaeriaceae* | *Pleosporales* | *Dothideomycetes* | ITS | 100 | JQ044439.1 |
| CF-168990 | *Libertasomyces* | *aloeticus* | *Libertasomycetaceae* | *Pleosporales* | *Dothideomycetes* | ITS | 99 | NR_165566.1 |
| CF-164420 | *Atrocalyx* | *nordicus* | *Lophiotremataceae* | *Pleosporales* | *Dothideomycetes* | ITS | 99 | NR_172997.1 |
| **CF-164476** | ***Desertiserpentica*** | **sp.** | ***Lophiostomataceae*** | ***Pleosporales*** | ***Dothideomycetes*** | **ITS** | **95** | **NR_173310.1** |
| **CF-168965** | ***Lophiostoma*** | **sp.** | ***Lophiostomaceae*** | ***Pleosporales*** | ***Dothideomycetes*** | **ITS** | **90** | **MZ492968.1** |
| **CF-168972** | ***Massarina*** | **sp.** | ***Massarinaceae*** | ***Pleosporales*** | ***Dothideomycetes*** | **ITS** | **90** | **KU314982.1** |
| CF-169052 | *Vaginatispora* | *fuckelii* | *Massarinaceae* | *Pleosporales* | *Dothideomycetes* | ITS | 100 | EU552139.1 |
| CF-164298 | *Vaginatispora* | *fuckelii* | *Massarinaceae* | *Pleosporales* | *Dothideomycetes* | ITS | 100 | EU552139.1 |
| CF-164425 | *Microsphaeropsis* | *arundinis* | *Didymellaceae* | *Pleosporales* | *Dothideomycetes* | ITS | 100 | MZ771279.1 |
| CF-164357 | *Microsphaeropsis* | *arundinis* | *Didymellaceae* | *Pleosporales* | *Dothideomycetes* | ITS | 100 | MZ771279.1 |
| CF-166088 | *Nigrograna* | sp. | *Nigrogranaceae* | *Pleosporales* | *Dothideomycetes* | ITS | 96 | KX650556.1 |
| **CF-168985** | ***Banksiophoma*** | **sp.** | ***Phaeosphaeriaceae*** | ***Pleosporales*** | ***Dothideomycetes*** | **ITS** | **95** | **NR_153651.1** |
| **CF-164432** | ***Banksiophoma*** | **sp.** | ***Phaeosphaeriaceae*** | ***Pleosporales*** | ***Dothideomycetes*** | **ITS** | **95** | **NR_153651.1** |
| CF-164483 | *Equiseticola* | sp. | *Phaeosphaeriaceae* | *Pleosporales* | *Dothideomycetes* | 28S | 98 | NG_059249.1 |
| CF-166144 | *Juncaceicola* | sp. | *Phaeosphaeriaceae* | *Pleosporales* | *Dothideomycetes* | ITS | 98 | NR_189996.1 |
| **CF-168961** | ***Neosetophoma*** | **sp.** | ***Phaeosphaeriaceae*** | ***Pleosporales*** | ***Dothideomycetes*** | **ITS** | **94** | **NR_185358.1** |
| CF-166173 | *Neostagonospora* | sp. | *Phaeosphaeriaceae* | *Pleosporales* | *Dothideomycetes* | ITS | 99 | MK595557.1 |
| CF-166164 | *Neostagonospora* | sp. | *Phaeosphaeriaceae* | *Pleosporales* | *Dothideomycetes* | ITS | 98 | NR_156265.1 |
| CF-164385 | *Nodulosphaeria* | *cirsi* | *Phaeosphaeriaceae* | *Pleosporales* | *Dothideomycetes* | ITS | 100 | KM014664.1 |
| CF-168971 | *Phaeosphaeria* | sp. | *Phaeosphaeriaceae* | *Pleosporales* | *Dothideomycetes* | ITS | 97 | NR_156608.1 |
| CF-169031 | *Phaeosphaeria* | *podocarpi* | *Phaeosphaeriaceae* | *Pleosporales* | *Dothideomycetes* | ITS | 99 | NR_137933.1 |
| **CF-169011** | ***Phaeosphaeria*** | **sp.** | ***Phaeosphaeriaceae*** | ***Pleosporales*** | ***Dothideomycetes*** | **ITS** | **93** | **OP596147.1** |
| **CF-164378** | ***Sclerostagonospora*** | **sp.** | ***Phaeosphaeriaceae*** | ***Pleosporales*** | ***Dothideomycetes*** | **ITS** | **95** | **JX517283.1/MH864458.1** |
| **CF-164373** | ***Sclerostagonospora*** | **sp.** | ***Phaeosphaeriaceae*** | ***Pleosporales*** | ***Dothideomycetes*** | **ITS** | **95** | **JX517283.1/MH864458.1** |
| **CF-166130** | ***Sclerostagonospora*** | **sp.** | ***Phaeosphaeriaceae*** | ***Pleosporales*** | ***Dothideomycetes*** | **ITS** | **91** | **JX517283.1** |
| CF-164426 | *Stagonospora* | sp. | *Phaeosphaeriaceae* | *Pleosporales* | *Dothideomycetes* | ITS | 98 | JX981494.1 |
| CF-164445 | *Wojnowiciella* | *dactylidis* | *Phaeosphaeriaceae* | *Pleosporales* | *Dothideomycetes* | ITS | 99 | MK442631.1 |
| CF-168960 | *Alternaria* | *infectoria* | *Pleosporaceae* | *Pleosporales* | *Dothideomycetes* | ITS | 99 | AY154690.1 |
| CF-164322 | *Alternaria* | *infectoria* | *Pleosporaceae* | *Pleosporales* | *Dothideomycetes* | ITS | 99 | AY154690.1 |
| CF-164254 | *Alternaria* | sp. | *Pleosporaceae* | *Pleosporales* | *Dothideomycetes* | ITS+28S | 98 | MK828116.1 |
| CF-166183 | *Curvularia* | *protuberata* | *Pleosporaceae* | *Pleosporales* | *Dothideomycetes* | ITS | 100 | KT012657.1 |
| CF-168989 | *Roussoella* | *euonymi* | *Roussoellaceae* | *Pleosporales* | *Dothideomycetes* | ITS | 100 | MH864531.1 |
| CF-164438 | *Forliomyces* | sp. | *Sporormiaceae* | *Pleosporales* | *Dothideomycetes* | ITS+28S | 96 | NR_154006.1 |
| CF-166145 | *Forliomyces* | sp. | *Sporormiaceae* | *Pleosporales* | *Dothideomycetes* | ITS+28S | 96 | NR_154006.1 |
| CF-164290 | *Forliomyces* | sp. | *Sporormiaceae* | *Pleosporales* | *Dothideomycetes* | ITS+28S | 96 | NR_154006.1 |
| CF-164337 | *Magnibotryascoma* | *mali* | *Teichosporaceae* | *Pleosporales* | *Dothideomycetes* | ITS | 99 | ON811501.1 |
| **CF-166025** | ***Ramusculicola*** | **sp.** | ***Teichosporaceae*** | ***Pleosporales*** | ***Dothideomycetes*** | **ITS** | **95** | **NR_170816.1** |
| CF-164286 | *Teichospora* | sp. | *Teichosporaceae* | *Pleosporales* | *Dothideomycetes* | ITS | 98 | NR_154656.1 |
| **CF-166140** | ***Teichospora*** | **sp.** | ***Teichosporaceae*** | ***Pleosporales*** | ***Dothideomycetes*** | **ITS** | **95** | **MW269313.1** |
| CF-164478 | *Thyridaria* | *macrostomoides* | *Thyridariaceae* | *Pleosporales* | *Dothideomycetes* | ITS+28S | 100 | EU552157.1 |
| **CF-166136** | ***Parapyrenochaeta*** | **sp.** | ***Incertae sedis*** | ***Pleosporales*** | ***Dothideomycetes*** | **ITS** | **94** | **NR155674.1** |
| **CF-164294** | ***Pleosporales*** | **sp.** | ***Incertae sedis*** | ***Pleosporales*** | ***Dothideomycetes*** | **28S** | **97** | **JF449883.1** |
| **CF-168999** | ***Pleosporales*** | **sp.** | ***Incertae sedis*** | ***Pleosporales*** | ***Dothideomycetes*** | **ITS** | **92** | **OM670119.1** |
| **CF-164456** | ***Pleosporales*** | **sp.** | ***Incertae sedis*** | ***Pleosporales*** | ***Dothideomycetes*** | **ITS** | **99** | **KR909157.1** |
| **CF-164416** | ***Pleosporales*** | **sp.** | ***Incertae sedis*** | ***Pleosporales*** | ***Dothideomycetes*** | **ITS** | **95** | **AB986465.1** |
| **CF-164321** | ***Pleosporales*** | **sp.** | ***Incertae sedis*** | ***Pleosporales*** | ***Dothideomycetes*** | **ITS** | **99** | **FJ552933.1** |
| **CF-164253** | ***Pleosporales*** | **sp.** | ***Incertae sedis*** | ***Pleosporales*** | ***Dothideomycetes*** | **ITS** | **92** | **KU204434.1** |
| CF-164448 | *Pseudocoleophoma* | sp. | *Incertae sedis* | *Pleosporales* | *Dothideomycetes* | ITS | 98 | LC765163.1 |
| CF-166054 | *Superstratomyces* | sp. | *Superstratomycetaceae* | *Superstratomycetales* | *Dothideomycetes* | ITS | 97 | NR_152544.1 |
| CF-166090 | *Sympoventuria* | *africanum* | *Sympoventuriaceae* | *Venturiales* | *Dothideomycetes* | ITS | 99 | EU035424.1 |
| CF-166066 | *Anungitea* | *grevilleae* | *Venturiaceae* | *Venturiales* | *Dothideomycetes* | ITS | 100 | KX228252.1 |
| **CF-164403** | ***Venturia*** | **sp.** | ***Venturiaceae*** | ***Venturiales*** | ***Dothideomycetes*** | **ITS** | **86** | **EU035464.1** |
| **CF-164450** | ***Pleomonodictys*** | **sp.** | ***Pleomonodictydaceae*** | ***Incertae sedis*** | ***Dothideomycetes*** | **ITS** | **90** | **NR_154369.1** |
| CF-166108 | *Nematostoma* | sp. | *Pseudoperisporiaceae* | *Incertae sedis* | *Dothideomycetes* | ITS | 97 | MT547815.1 |
| **CF-166106** | ***Pseudoarthrographis*** | **sp.** | ***Incertae sedis*** | ***Incertae sedis*** | ***Dothideomycetes*** | **ITS** | **89** | **NR_160349.1** |
| CF-169016 | *Pyrenochaeta* | *nobilis* | *Incertae sedis* | *Incertae sedis* | *Dothideomycetes* | ITS | 100 | MF795792.1 |
| CF-166058 | *Scleroconidioma* | *sphagnicola* | *Incertae sedis* | *Incertae sedis* | *Dothideomycetes* | ITS | 100 | DQ182416.1 |
| CF-164245 | *Scleroconidioma* | *sphagnicola* | *Incertae sedis* | *Incertae sedis* | *Dothideomycetes* | ITS | 100 | DQ182416.1 |
| **CF-168994** | ***Tremateia*** | **sp.** | ***Incertae sedis*** | ***Incertae sedis*** | ***Dothideomycetes*** | **ITS** | **93** | **NR_168867.1** |
| **CF-164481** | ***Cyphellophora*** | **sp.** | ***Cyphellophoraceae*** | ***Chaetothyriales*** | ***Eurotiomycetes*** | **ITS** | **90** | **NR_163356.1** |
| **CF-166027** | ***Cyphellophora*** | **sp.** | ***Cyphellophoraceae*** | ***Chaetothyriales*** | ***Eurotiomycetes*** | **28S** | **98** | **NR_153555.1** |
| CF-168997 | *Capronia* | *coronata* | *Herpotrichiellaceae* | *Chaetothyriales* | *Eurotiomycetes* | ITS+28s | 100 | AF050242.1 |
| CF-166132 | *Cladophialophora* | sp. | *Herpotrichiellaceae* | *Chaetothyriales* | *Eurotiomycetes* | ITS | 98 | OQ913855.1 |
| CF-166060 | *Cladophialophora* | sp. | *Herpotrichiellaceae* | *Chaetothyriales* | *Eurotiomycetes* | ITS | 98 | OP437822.1 |
| CF-166072 | *Exophiala* | sp. | *Herpotrichiellaceae* | *Chaetothyriales* | *Eurotiomycetes* | ITS | 98 | OW988156.1 |
| CF-166037 | *Exophiala* | sp. | *Herpotrichiellaceae* | *Chaetothyriales* | *Eurotiomycetes* | ITS | 96 | OW988156.1 |
| **CF-164291** | ***Melnikomyces*** | **sp.** | ***Incertae sedis*** | ***Chaetothyriales*** | ***Eurotiomycetes*** | **ITS** | **88** | **NR_166358.1** |
| CF-166082 | *Phaeoannellomyces* | *elegans* | *Incertae sedis* | *Chaetothyriales* | *Eurotiomycetes* | ITS | 100 | MZ956802.1 |
| CF-164393 | *Penicillium* | *brevicompactum* | *Aspergillaceae* | *Eurotiales* | *Eurotiomycetes* | ITS | 100 | PP165506.1 |
| **CF-166063** | ***Penicillium*** | **sp.** | ***Aspergillaceae*** | ***Eurotiales*** | ***Eurotiomycetes*** | **ITS** | **95** | **NR_103667.2** |
| CF-169047 | *Neophaeomoniella* | sp. | *Celotheliaceae* | *Phaeomoniellales* | *Eurotiomycetes* | ITS | 97 | GQ153127.1/MZ127178.1 |
| CF-169002 | *Neophaeomoniella* | *zymoides* | *Celotheliaceae* | *Phaeomoniellales* | *Eurotiomycetes* | 28S | 99 | GQ153127.1/MZ127178.1 |
| CF-166032 | *Neophaeomoniella* | sp. | *Celotheliaceae* | *Phaeomoniellales* | *Eurotiomycetes* | ITS | 98 | GQ153127.1 |
| **CF-166096** | ***Phaeomoniella*** | **sp.** | ***Celotheliaceae*** | ***Phaeomoniellales*** | ***Eurotiomycetes*** | **ITS** | **85** | **KX901894.1** |
| **CF-164222** | ***Phaeomoniella*** | **sp.** | ***Celotheliaceae*** | ***Phaeomoniellales*** | ***Eurotiomycetes*** | **ITS** | **86** | **KX901894.1** |
| CF-164398 | *Arachnopeziza* | sp. | *Arachnopezizaceae* | *Helotiales* | *Leotiomycetes* | ITS | 98 | OM951264.1 |
| CF-164375 | *Arachnopeziza* | *aurata* | *Arachnopezizaceae* | *Helotiales* | *Leotiomycetes* | ITS | 100 | MH558278.1 |
| CF-166089 | *Coleophoma* | sp. | *Dermateaceae* | *Helotiales* | *Leotiomycetes* | ITS | 98 | MK762611.1 |
| CF-164376 | *Xenopolyscytalum* | *pinea* | *Hamatocanthoscyphaceae* | *Helotiales* | *Leotiomycetes* | ITS | 100 | NR_156543.1 |
| **CF-164399** | ***Hymenoscyphus*** | **sp.** | ***Helotiaceae*** | ***Helotiales*** | ***Leotiomycetes*** | **ITS** | **97** | **FJ827234.1** |
| CF-166138 | *Proliferodiscus* | sp. | *Lachnaceae* | *Helotiales* | *Leotiomycetes* | ITS | 99 | LC438558.1 |
| CF-164261 | *Mollisia* | *novobrunsvicensis* | *Mollisiaceae* | *Helotiales* | *Leotiomycetes* | ITS | 100 | MT026439.1 |
| CF-166097 | *Mollisia* | *panicicola* | *Mollisiaceae* | *Helotiales* | *Leotiomycetes* | 28S | 99 | KF874621.1 |
| CF-166187 | *Oidiodendron* | sp. | *Myxotrichaceae* | *Helotiales* | *Leotiomycetes* | ITS | 99 | MH864648.1 |
| CF-164333 | *Oidiodendron* | *tenuissimum* | *Myxotrichaceae* | *Helotiales* | *Leotiomycetes* | ITS | 99 | MH864345.1 |
| CF-164233 | *Neocrinula* | *lambertiae* | *Neocrinulaceae* | *Helotiales* | *Leotiomycetes* | ITS | 99 | MG386049.1 |
| CF-164331 | *Chalara* | sp. | *Pezizellaceae* | *Helotiales* | *Leotiomycetes* | ITS | 99 | FR66723.1 |
| CF-164384 | *Nagrajchalara* | sp. | *Pezizellaceae* | *Helotiales* | *Leotiomycetes* | ITS | 96 | OQ145667.1 |
| CF-166040 | *Nagrajchalara* | sp. | *Pezizellaceae* | *Helotiales* | *Leotiomycetes* | ITS | 96 | OQ145679.1 |
| CF-164446 | *Lanzia* | *griselinia* | *Rutstroemiaceae* | *Helotiales* | *Leotiomycetes* | ITS | 99 | MH003473.1 |
| CF-166180 | *Stromatinia* | sp. | *Sclerotiniaceae* | *Helotiales* | *Leotiomycetes* | ITS | 97 | MH856286.1 |
| CF-164276 | *Tetracladium* | *terrestre* | *Solenopeziaceae* | *Helotiales* | *Leotiomycetes* | ITS | 100 | NR_160144 |
| CF-164329 | *Tricladium* | *attenuatum* | *Tricladiaceae* | *Helotiales* | *Leotiomycetes* | ITS | 99 | MH860241.1 |
| **CF-164338** | ***Helotiales*** | **sp.** | ***Incertae sedis*** | ***Helotiales*** | ***Leotiomycetes*** | **ITS** | **97** | **MG707591.1** |
| **CF-169050** | ***Helotiales*** | **sp.** | ***Incertae sedis*** | ***Helotiales*** | ***Leotiomycetes*** | **ITS** | **96** | **HE605242.1** |
| **CF-166107** | ***Helotiales*** | **sp.** | ***Incertae sedis*** | ***Helotiales*** | ***Leotiomycetes*** | **ITS** | **98** | **MG707591.1** |
| **CF-166028** | ***Helotiales*** | **sp.** | ***Incertae sedis*** | ***Helotiales*** | ***Leotiomycetes*** | **ITS** | **98** | **KY654691.1** |
| **CF-164397** | ***Helotiales*** | **sp.** | ***Incertae sedis*** | ***Helotiales*** | ***Leotiomycetes*** | **ITS** | **91** | **FJ378851.1** |
| **CF-164371** | ***Helotiales*** | **sp.** | ***Incertae sedis*** | ***Helotiales*** | ***Leotiomycetes*** | **ITS** | **98** | **KY654691.1** |
| **CF-164350** | ***Helotiales*** | **sp.** | ***Incertae sedis*** | ***Helotiales*** | ***Leotiomycetes*** | **ITS** | **98** | **JF519573.1** |
| **CF-166188** | ***Lophodermium*** | **sp.** | ***Rhytismataceae*** | ***Rhytismatales*** | ***Leotiomycetes*** | **ITS** | **95** | **EU520183.1** |
| **CF-166092** | ***Arthrobotrys*** | **sp.** | ***Orbiliaceae*** | ***Orbiliales*** | ***Orbiliomycetes*** | **ITS** | **87** | **NR_175054.1** |
| CF-166116 | *Conoplea* | *fusca* | *Sarcosomataceae* | *Pezizales* | *Pezizomycetes* | ITS+28S | 100 | EU552114.1 |
| CF-166119 | *Plectania* | sp. | *Sarcosomataceae* | *Pezizales* | *Pezizomycetes* | ITS | 98 | OL653020.1 |
| CF-164324 | *Plectania* | sp. | *Sarcosomataceae* | *Pezizales* | *Pezizomycetes* | ITS | 98 | OL653020.1 |
| CF-164414 | *Immersidiscosia* | *eucalypti* | *Amphisphaeriaceae* | *Amphisphaeriales* | *Sordariomycetes* | ITS | 100 | AB594790.1 |
| CF-169004 | *Bartalinia* | *lateralis* | *Bartaliniaceae* | *Amphisphaeriales* | *Sordariomycetes* | ITS | 100 | NR_161087.1 |
| CF-164469 | *Bartalinia* | *pondoensis* | *Bartaliniaceae* | *Amphisphaeriales* | *Sordariomycetes* | ITS | 100 | NR_153599.1 |
| **CF-164325** | ***Discosia*** | **sp.** | ***Discosiaceae*** | ***Amphisphaeriales*** | ***Sordariomycetes*** | **ITS** | **100** | **AB594784.1** |
| CF-164369 | *Phlogicylindrium* | sp. | *Phlogicylindriaceae* | *Amphisphaeriales* | *Sordariomycetes* | 28S | 99 | KJ869176.1 |
| CF-166091 | *Sarcostroma* | sp. | *Sporocadaceae* | *Amphisphaeriales* | *Sordariomycetes* | ITS | 98 | EU552155.1 |
| CF-164412 | *Phialemonium* | *inflatum* | *Cephalothecaceae* | *Cephalothecales* | *Sordariomycetes* | ITS | 100 | NR_165996.1 |
| CF-164345 | *Cylindrium* | sp. | *Cylindriaceae* | *Hypocreales* | *Sordariomycetes* | ITS | 98 | MT223792.1 |
| CF-164257 | *Acrostalagmus* | *luteoalbus* | *Hypocreaceae* | *Hypocreales* | *Sordariomycetes* | ITS | 100 | OW987052.1 |
| CF-164359 | *Cosmospora* | sp. | *Nectriaceae* | *Hypocreales* | *Sordariomycetes* | ITS | 100 | OW983055.1/NR_182322.1 |
| CF-164454 | *Dactylonectria* | sp. | *Nectriaceae* | *Hypocreales* | *Sordariomycetes* | ITS | 100 | JX231152.1/MN944923.1 |
| CF-168993 | *Fusarium* | *oxysporum* | *Nectriaceae* | *Hypocreales* | *Sordariomycetes* | ITS | 100 | LT841208.1 |
| CF-164444 | *Fusarium* | sp. | *Nectriaceae* | *Hypocreales* | *Sordariomycetes* | ITS | 100 | MT453281.1 |
| CF-164275 | *Fusarium* | *incarnatum-equiseti complex* | *Nectriaceae* | *Hypocreales* | *Sordariomycetes* | ITS | 100 | MG274307.1 |
| CF-164460 | *Volutella* | sp. | *Nectriaceae* | *Hypocreales* | *Sordariomycetes* | ITS | 99 | OU989510.1 |
| CF-164466 | *Tolypocladium* | sp. | *Ophiocordycipitaceae* | *Hypocreales* | *Sordariomycetes* | ITS | 97 | NR_155019.1 |
| CF-169007 | *Sirastachys* | *phaeospora* | *Stachybotryaceae* | *Hypocreales* | *Sordariomycetes* | ITS | 100 | KU846667.1 |
| CF-164453 | *Acremonium* | *antarticum* | *Incertae sedis* | *Hypocreales* | *Sordariomycetes* | ITS | 100 | MG250387.1 |
| CF-166074 | *Sarocladium* | sp. | *Incertae sedis* | *Hypocreales* | *Sordariomycetes* | ITS | 100 | MK579174.1/GU189520.1 |
| CF-166160 | *Myrmecridium* | sp. | *Incertae sedis* | *Myrmecridiales* | *Sordariomycetes* | ITS | 99 | KX306762.1 |
| CF-169032 | *Phaeoacremonium* | *africanum* | *Togniniaceae* | *Togniniales* | *Sordariomycetes* | ITS | 99 | NR_135940.1 |
| CF-166113 | *Phaeoacremonium* | sp. | *Togniniaceae* | *Togniniales* | *Sordariomycetes* | ITS | 96 | EU552161.1 |
| CF-166109 | *Anthostomella* | sp. | *Xylariaceae* | *Xylariales* | *Sordariomycetes* | ITS | 98 | NR_153510.1 |
| CF-164421 | *Anthostomella* | sp. | *Xylariaceae* | *Xylariales* | *Sordariomycetes* | ITS | 99 | NR_175686.1 |
| CF-166110 | *Anthostomelloides* | sp. | *Xylariaceae* | *Xylariales* | *Sordariomycetes* | ITS | 98 | NR_153510.1 |
| CF-164462 | *Neoanthostomella* | *viticola* | *Xylariaceae* | *Xylariales* | *Sordariomycetes* | ITS | 100 | ON400757.1 |
| CF-164440 | *Neoanthostomella* | sp. | *Xylariaceae* | *Xylariales* | *Sordariomycetes* | ITS | 99 | ON400757.1 |
| **CF-164451** | ***Neoanthostomella*** | **sp.** | ***Xylariaceae*** | ***Xylariales*** | ***Sordariomycetes*** | **ITS** | **93** | **NR_174847.1** |
| CF-166165 | *Pleurophoma* | sp. | *Incertae sedis* | *Xylariales* | *Sordariomycetes* | ITS | 98 | OQ410705.1 |
| CF-166159 | *Pleurophoma* | *pleurospora* | *Incertae sedis* | *Xylariales* | *Sordariomycetes* | ITS | 100 | OQ410705.1 |
| CF-166146 | *Arthrinium* | sp. | *Apiosporaceae* | *Incertae sedis* | *Sordariomycetes* | ITS | 100 | KF144883.1 |
| CF-164427 | *Arthrinium* | sp. | *Apiosporaceae* | *Incertae sedis* | *Sordariomycetes* | ITS | 98 | NR_166043.1 |
| CF-164418 | *Arthrinium* | *kogelbergense* | *Apiosporaceae* | *Incertae sedis* | *Sordariomycetes* | ITS | 100 | NR_120272 |
| **CF-164467** | ***Sordariomycetes*** | **sp.** | ***Incertae sedis*** | ***Incertae sedis*** | ***Sordariomycetes*** | **ITS** | **91** | **MT183990.1** |
| CF-166101 | *Ochroconis* | sp. | *Incertae sedis* | *Incertae sedis* | *Incertae sedis* | ITS+28S | 97 | AB564619.1 |
| CF-164346 | *Polyscytalum* | *vaccinii* | *Incertae sedis* | *Incertae sedis* | *Incertae sedis* | ITS | 100 | NR_175211.1 |
| CF-166052 | *Rhexodenticula* | sp. | *Incertae sedis* | *Incertae sedis* | *Incertae sedis* | ITS | 98 | NR_154447.1 |
| **CF-164484** | ***Scolecobasidium*** | **sp.** | ***Incertae sedis*** | ***Incertae sedis*** | ***Incertae sedis*** | **ITS** | **88** | **OQ917081.1** |
| CF-164413 | *Pseudosigmoidea* | sp. | *Incertae sedis* | *Incertae sedis* | *Incertae sedis* | ITS | 96 | NR_185383 |
| **CF-164400** | ***Dendrosporium*** | **sp.** | ***Incertae sedis*** | ***Incertae sedis*** | ***Incertae sedis*** | **ITS+28S** | **93** | **MH855767.1** |
| CF-164475 | *Gyrothrix* | sp. | *Incertae sedis* | *Incertae sedis* | *Incertae sedis* | ITS | 99 | ON400759.1 |
| CF-164406 | *unidentified* | *fungus* | *Incertae sedis* | *Incertae sedis* | *Incertae sedis* | - | - | - |
| CF-164396 | *unidentified* | *fungus* | *Incertae sedis* | *Incertae sedis* | *Incertae sedis* | - | - | - |
| CF-166114 | *unidentified* | *fungus* | *Incertae sedis* | *Incertae sedis* | *Incertae sedis* | - | - | - |
| CF-166103 | *unidentified* | *fungus* | *Incertae sedis* | *Incertae sedis* | *Incertae sedis* | - | - | - |
| CF-168963 | *unidentified* | *fungus* | *Incertae sedis* | *Incertae sedis* | *Incertae sedis* | - | - | - |
| **CF-166098** | ***Cryptomarasmius*** | **sp.** | ***Physalacriaceae*** | ***Agaricales*** | ***Agaricomycetes*** | **ITS** | **94** | **OQ725929.1** |
| CF-164455 | *Coprinellus* | *micaceus* | *Psathyrellaceae* | *Agaricales* | *Agaricomycetes* | ITS | 100 | MK656239.1 |
| CF-164301 | *Serpula* | *himantioides* | *Serpulaceae* | *Boletales* | *Agaricomycetes* | ITS | 99 | GU187545.1 |
| **CF-164389** | ***Clavulina*** | **sp.** | ***Hydnaceae*** | ***Cantharellales*** | ***Agaricomycetes*** | **ITS** | **92** | **HQ022108.1** |
| **CF-164252** | ***Sistotrema*** | **sp.** | ***Hydnaceae*** | ***Cantharellales*** | ***Agaricomycetes*** | **ITS** | **93** | **KF218968.1** |
| CF-164409 | *Sistotrema* | sp. | *Hydnaceae* | *Cantharellales* | *Agaricomycetes* | ITS | 99 | KC965692.1 |
| CF-164268 | *Tulasnella* | sp. | *Tulasnellaceae* | *Cantharellales* | *Agaricomycetes* | ITS | 99 | AB369940.1 |
| **CF-166036** | ***Corticium*** | **sp.** | ***Corticiaceae*** | ***Corticiales*** | ***Agaricomycetes*** | **ITS** | **92** | **MH520061.1** |
| **CF-164227** | ***Corticium*** | **sp.** | ***Corticiaceae*** | ***Corticiales*** | ***Agaricomycetes*** | **ITS** | **92** | **MW805881.1** |
| CF-164430 | *Marchandiomyces* | sp. | *Corticiaceae* | *Corticiales* | *Agaricomycetes* | 28S | 97 | AY583332.1 |
| CF-169012 | *Phanerochaete* | sp. | *Phanerochaetaceae* | *Polyporales* | *Agaricomycetes* | ITS | 99 | NR_175173.1 |
| CF-164344 | *Trametes* | *versicolor* | *Polyporaceae* | *Polyporales* | *Agaricomycetes* | ITS | 100 | NR_154494.1 |
| CF-166155 | *Cystobasidium* | *slooffiae* | *Cystobasidiaceae* | *Cystobasidiales* | *Cystobasidiomycetes* | 28S | 99 | AB025994.2 |
| CF-166083 | *Sporobolomyces* | *roseus* | *Sporidiobolaceae* | *Sporidiobolales* | *Microbotryomycetes* | ITS | 100 | KY611834.1 |
| CF-166129 | *Wallemia* | *mellicola* | *Wallemiaceae* | *Wallemiales* | *Wallemiomycetes* | ITS | 100 | OP596062.1 |
| CF-164405 | *Umbelopsis* | sp. | *Umbelopsidaceae* | *Umbelopsidales* | *Incertae sedis* | 28S | 99 | MF417090.1 |

**
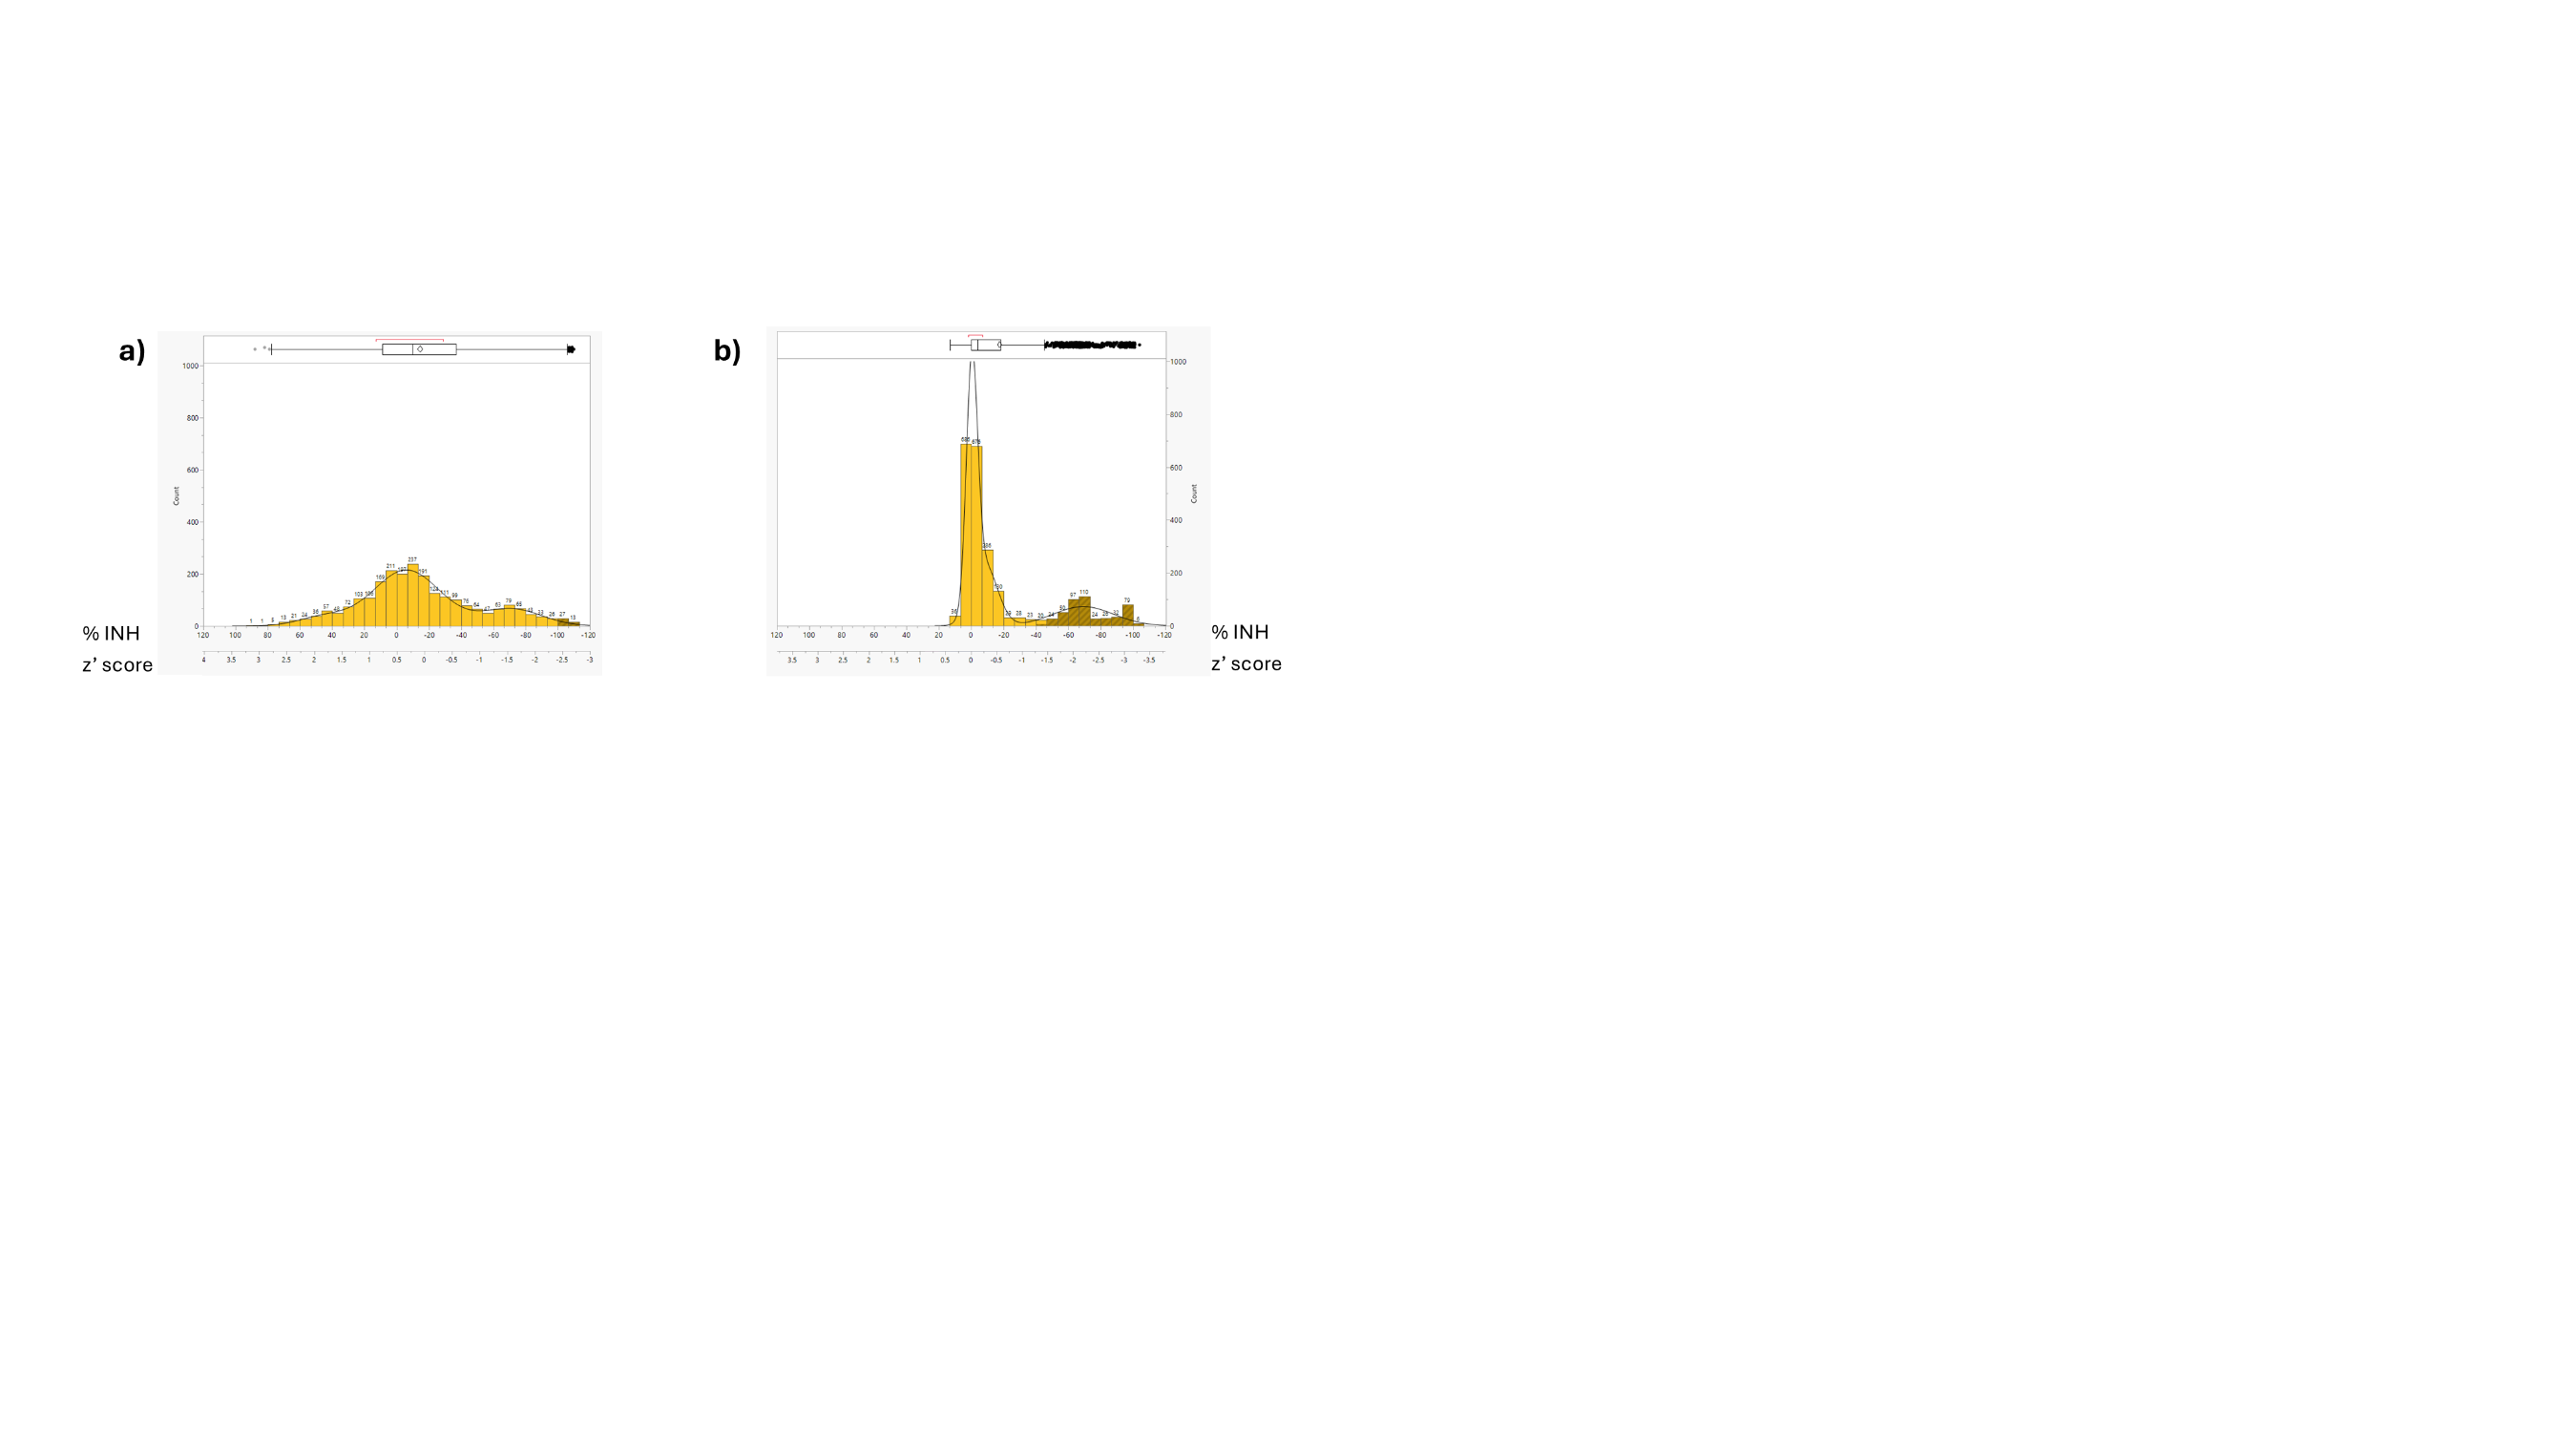
**

**Figure S1.** Distribution of antifungal activity based on **(a)** absorbance and **(b)** fluorescence data against *Magnaporthe grisea*, including extracts from BRFT medium. The x-axis shows the range of percentage of inhibition and the corresponding z’ score values, while the y-axis shows the frequency of occurrences.

**Table S2.** Categorization of the active strains according to their activity profiles obtained from conditions without SAHA (**n**), induced by SAHA (**S**) or common to both fermentation conditions with and without SAHA (**c**), against the four fungal phytopathogens **BC** (*Botrytis cinerea*), **CA** (*Colletotrichum acutatum*), **FP** (*Fusarium proliferatum*) and **MG** (*Magnaporthe grisea*), and the HepG2 cell line.

| **Strain** | **Taxonomy** | **BC** | | | **CA** | | | **FP** | | | **MG** | | | **HepG2** | | | **LC-MS Dereplication** |
| --- | --- | --- | --- | --- | --- | --- | --- | --- | --- | --- | --- | --- | --- | --- | --- | --- | --- |
| **n** | **c** | **S** | **n** | **c** | **S** | **n** | **c** | **S** | **n** | **c** | **S** | **n** | **c** | **S** |
| CF-164279 | *Phomatodes nebulosa* | 0 | 1 | 0 | 0 | 1 | 0 | 0 | 1 | 0 | 0 | 1 | 0 | 0 | 1 | 0 | palmarumycins B1, B9, C12, C13, C15 & C16, preussomerins B & L, stemphyltoxin I |
| CF-164387 | *Phomatodes nebulosa* | 0 | 1 | 0 | 0 | 1 | 0 | 0 | 1 | 0 | 0 | 1 | 0 | 0 | 1 | 0 | palmarumycins C15 & C16, preussomerin B, stemphyltoxin I |
| CF-164398 | *Arachnopeziza* sp. | 0 | 1 | 0 | 0 | 1 | 0 | 0 | 1 | 0 | 0 | 1 | 0 | 0 | 1 | 0 | myriocin |
| CF-168994 | *Tremateia* sp. | 0 | 1 | 0 | 0 | 1 | 0 | 0 | 1 | 0 | 0 | 1 | 0 | 0 | 0 | 0 | lecanorin, hyalodendrin |
| CF-168996 | *Phoma* sp. | 0 | 1 | 0 | 0 | 1 | 0 | 0 | 1 | 0 | 0 | 1 | 0 | 0 | 0 | 0 | lecanorin, hyalodendrin |
| CF-164385 | *Nodulosphaeria cirsi* | 0 | 1 | 0 | 0 | 0 | 1 | 0 | 1 | 0 | 0 | 1 | 0 | 0 | 1 | 0 | integrastatins A & B, radicinol, heptelidic acid, massarilactone H |
| CF-168984 | *Alfoldia* sp. | 0 | 1 | 0 | 1 | 0 | 0 | 1 | 0 | 0 | 0 | 1 | 0 | 1 | 0 | 0 | hyalodendrin, gliovictin |
| CF-164467 | *Sordariomycetes* sp. | 1 | 0 | 0 | 1 | 0 | 0 | 0 | 0 | 0 | 0 | 1 | 0 | 1 | 0 | 0 | leucinostatins A/U, B & K, pyrenocine G |
| CF-166102 | *Phomatodes nebulosa* | 0 | 0 | 0 | 1 | 0 | 0 | 1 | 0 | 0 | 0 | 1 | 0 | 0 | 1 | 0 | palmarumycins C15 & C16, preussomerin B, stemphyltoxin I, zearalenone |
| CF-164236 | *Flammeascoma* sp. | 0 | 0 | 1 | 0 | 0 | 0 | 1 | 0 | 0 | 0 | 1 | 0 | 0 | 1 | 0 | 6-(1-hydroxyethyl)-5-hydroxy-2,7-dimethoxy-1,4-naphthoquinone, mycophenolic acid, rubellin A |
| CF-164341 | *Cryptocoryneum* sp. | 0 | 0 | 1 | 0 | 0 | 0 | 0 | 1 | 0 | 0 | 1 | 0 | 0 | 1 | 0 | palmarumycins B9, C15 & C16, preussomerins B & L, stemphyltoxin I |
| CF-164386 | *Phomatodes nebulosa* | 0 | 0 | 1 | 0 | 0 | 0 | 0 | 1 | 0 | 0 | 1 | 0 | 0 | 1 | 0 | palmarumycins C16 & C15, preussomerin B, stemphyltoxin I, zearalenone |
| CF-164451 | *Neoanthostomella* sp. | 0 | 0 | 0 | 0 | 0 | 0 | 0 | 0 | 1 | 0 | 1 | 0 | 0 | 1 | 0 | antibiotic TMC 264, cinatrin C1/C2/C3, rhizopicnin A |
| CF-164254 | *Alternaria* sp. | 0 | 0 | 0 | 0 | 0 | 0 | 0 | 0 | 1 | 0 | 0 | 0 | 1 | 0 | 0 | 7-O-ethylfulvic acid, 3-hydroxy-5,7-dimethoxy-2-(2-oxopropyl)naphthalene-1,4-dione, altenuene |
| CF-164344 | *Trametes versicolor* | 1 | 0 | 0 | 0 | 0 | 0 | 0 | 0 | 0 | 1 | 0 | 0 | 1 | 0 | 0 |  |
| CF-169007 | *Sirastachys phaeospora* | 1 | 0 | 0 | 0 | 0 | 0 | 0 | 0 | 0 | 0 | 1 | 0 | 0 | 0 | 0 | mellein |
| CF-164345 | *Cylindrium* sp. | 1 | 0 | 0 | 0 | 0 | 0 | 0 | 0 | 0 | 0 | 0 | 1 | 0 | 0 | 0 | mellein and 4/3-hydroxymellein |
| CF-164389 | *Clavulina* sp. | 1 | 0 | 0 | 0 | 0 | 0 | 0 | 0 | 0 | 0 | 0 | 0 | 0 | 1 | 0 |  |
| CF-166074 | *Sarocladium* sp. | 1 | 0 | 0 | 0 | 0 | 0 | 0 | 0 | 0 | 0 | 0 | 0 | 0 | 0 | 0 |  |
| CF-164227 | *Corticium* sp. | 0 | 1 | 0 | 0 | 0 | 0 | 0 | 0 | 0 | 0 | 1 | 0 | 0 | 1 | 0 | connatusin B |
| CF-166114 | unidentified fungus | 0 | 1 | 0 | 0 | 0 | 0 | 0 | 0 | 0 | 0 | 1 | 0 | 0 | 1 | 0 | chaetoglobosin N & K |
| CF-166164 | *Neostagonospora* sp. | 0 | 1 | 0 | 0 | 0 | 0 | 0 | 0 | 0 | 0 | 1 | 0 | 0 | 0 | 0 | 2-(3,4-epoxy-5-heptenoyl)-5-methylpyrrole, mellein |
| CF-164425 | *Microsphaeropsis arundinis* | 0 | 1 | 0 | 0 | 0 | 0 | 0 | 0 | 0 | 0 | 0 | 0 | 0 | 0 | 0 | deoxydihydrofuscin, LL-D-253g, resorcylide |
| CF-164396 | unidentified fungus | 0 | 1 | 0 | 0 | 0 | 0 | 0 | 0 | 0 | 0 | 0 | 0 | 0 | 0 | 0 |  |
| CF-164382 | *Dothidea eucalypti* | 0 | 0 | 1 | 0 | 0 | 0 | 0 | 0 | 0 | 0 | 0 | 1 | 0 | 0 | 1 |  |
| CF-164331 | *Chalara* sp. | 0 | 0 | 1 | 0 | 0 | 0 | 0 | 0 | 0 | 0 | 0 | 1 | 0 | 1 | 0 | emestrin |
| CF-164488 | *Dothiora coronillae* | 0 | 0 | 1 | 0 | 0 | 0 | 0 | 0 | 0 | 0 | 0 | 1 | 1 | 0 | 0 | monocerin |
| CF-166187 | *Oidiodendron* sp. | 0 | 0 | 1 | 0 | 0 | 0 | 0 | 0 | 0 | 0 | 1 | 0 | 1 | 0 | 0 | asterric acid, bisdechlorodihydrogeodin |
| CF-164416 | *Pleosporales* sp. | 0 | 0 | 1 | 0 | 0 | 0 | 0 | 0 | 0 | 0 | 1 | 0 | 1 | 0 | 0 | radicidin |
| CF-166098 | *Cryptomarasmius* sp. | 0 | 0 | 1 | 0 | 0 | 0 | 0 | 0 | 0 | 0 | 1 | 0 | 0 | 1 | 0 | diorcinol |
| CF-164483 | *Equiseticola* sp. | 0 | 0 | 1 | 0 | 0 | 0 | 0 | 0 | 0 | 0 | 1 | 0 | 0 | 1 | 0 | aspochalasins, infectopyrone |
| CF-164261 | *Mollisia novobrunsvicensis* | 0 | 0 | 1 | 0 | 0 | 0 | 0 | 0 | 0 | 0 | 1 | 0 | 0 | 0 | 0 | cerebroside B |
| CF-166041 | *Pyrenochaeta pinicola* | 0 | 0 | 1 | 0 | 0 | 0 | 0 | 0 | 0 | 0 | 1 | 0 | 0 | 0 | 0 | 9-chloro-10-hydroxy-8-methoxycarbonyl-4-methylene-2,5-dioxabicyclodec-7-en-3-one, radicidin |
| CF-164378 | *Sclerostagonospora* sp. | 0 | 0 | 1 | 0 | 0 | 0 | 0 | 0 | 0 | 0 | 1 | 0 | 0 | 0 | 0 | 11,12-hydroxyeudesm-4-en-o-one, dihydroilludin M |
| CF-164440 | *Neoanthostomella* sp. | 0 | 0 | 1 | 0 | 0 | 0 | 0 | 0 | 0 | 0 | 1 | 0 | 0 | 0 | 0 | cinatrin B, connatusin B, illudin M |
| CF-164281 | *Neoconiothyrium* sp. | 0 | 0 | 1 | 0 | 0 | 0 | 0 | 0 | 0 | 1 | 0 | 0 | 0 | 0 | 0 | L-783277, cochliomycin D/E/F |
| CF-166036 | *Corticium* sp. | 0 | 0 | 1 | 0 | 0 | 0 | 0 | 0 | 0 | 0 | 0 | 0 | 0 | 1 | 0 | leucinostatin K |
| CF-166144 | *Juncaceicola* sp. | 0 | 0 | 1 | 0 | 0 | 0 | 0 | 0 | 0 | 0 | 0 | 0 | 0 | 1 | 0 | 6-(1-hydroxyethyl)-5-hydroxy-2,7-dimethoxy-1,4-naphthoquinone, radicinol |
| CF-164233 | *Neocrinula lambertiae* | 0 | 0 | 1 | 0 | 0 | 0 | 0 | 0 | 0 | 0 | 0 | 0 | 0 | 1 | 0 | leucinostatins A/U & B |
| CF-166157 | *Ascochyta* sp. | 0 | 0 | 1 | 0 | 0 | 0 | 0 | 0 | 0 | 0 | 0 | 0 | 0 | 1 | 0 | brefeldin A, ovalacin |
| CF-166110 | *Anthostomelloides* sp. | 0 | 0 | 1 | 0 | 0 | 0 | 0 | 0 | 0 | 0 | 0 | 0 | 0 | 1 | 0 | anhydrosepedonin, cytochalasins H & E, heptelidic acid, ternatin |
| CF-166109 | *Anthostomella* sp. | 0 | 0 | 1 | 0 | 0 | 0 | 0 | 0 | 0 | 0 | 0 | 0 | 0 | 1 | 0 | anhydrosepedonin, cytochalasins, heptelidic acid, ternatin |
| CF-166063 | *Penicillium* sp. | 0 | 0 | 1 | 0 | 0 | 0 | 0 | 0 | 0 | 0 | 0 | 0 | 0 | 0 | 1 | antibiotic NG 011 |
| CF-164445 | *Wojnowiciella dactylidis* | 0 | 0 | 1 | 0 | 0 | 0 | 0 | 0 | 0 | 0 | 0 | 0 | 0 | 0 | 1 | 11-desacetoxywortmannin, asterric acid, bisdechlorodihydrogeodin, epolone A, methyldihydromitorubin, nomofungin, pycnidione |
| CF-164478 | *Thyridaria macrostomoides* | 0 | 0 | 1 | 0 | 0 | 0 | 0 | 0 | 0 | 0 | 0 | 0 | 0 | 0 | 0 | Oxasetin |
| CF-166058 | *Scleroconidioma sphagnicola* | 0 | 0 | 1 | 0 | 0 | 0 | 0 | 0 | 0 | 0 | 0 | 0 | 0 | 0 | 0 | AS2077715 |
| CF-164234 | *Neofusicoccum protearum* | 0 | 0 | 1 | 0 | 0 | 0 | 0 | 0 | 0 | 0 | 0 | 0 | 0 | 0 | 0 | mellein |
| CF-166091 | *Sarcostroma* sp. | 0 | 0 | 1 | 0 | 0 | 0 | 0 | 0 | 0 | 0 | 0 | 0 | 0 | 0 | 0 | diorcinol, hyalodendrin, nemanolone A |
| CF-164337 | *Magnibotryascoma mali* | 0 | 0 | 1 | 0 | 0 | 0 | 0 | 0 | 0 | 0 | 0 | 0 | 0 | 0 | 0 |  |
| CF-164439 | *Didymosphaeria variabile* | 0 | 0 | 1 | 0 | 0 | 0 | 0 | 0 | 0 | 0 | 0 | 0 | 0 | 0 | 0 | connatusin B, deoxydihydrofuscin, diocinol F |
| CF-164283 | *Pyrenochaeta* sp. | 0 | 0 | 1 | 0 | 0 | 0 | 0 | 0 | 0 | 0 | 0 | 0 | 0 | 0 | 0 | infectopyrone |
| CF-164290 | *Forliomyces* sp. | 0 | 0 | 1 | 0 | 0 | 0 | 0 | 0 | 0 | 0 | 0 | 0 | 0 | 0 | 0 | ascomycone A, mellein |
| CF-164357 | *Microsphaeropsis arundinis* | 0 | 0 | 1 | 0 | 0 | 0 | 0 | 0 | 0 | 0 | 0 | 0 | 0 | 0 | 0 |  |
| CF-164362 | *Dothiora maculans* | 0 | 0 | 1 | 0 | 0 | 0 | 0 | 0 | 0 | 0 | 0 | 0 | 0 | 0 | 0 |  |
| CF-164383 | *Pseudocamarosporium brabeji* | 0 | 0 | 1 | 0 | 0 | 0 | 0 | 0 | 0 | 0 | 0 | 0 | 0 | 0 | 0 | stemphol |
| CF-164466 | *Tolypocladium* sp. | 0 | 0 | 1 | 0 | 0 | 0 | 0 | 0 | 0 | 0 | 0 | 0 | 0 | 0 | 0 |  |
| CF-164471 | *Coniothyrium* sp. | 0 | 0 | 1 | 0 | 0 | 0 | 0 | 0 | 0 | 0 | 0 | 0 | 0 | 0 | 0 | sch-217048, sch-218157, sch-378161, pleosporin A |
| CF-166027 | *Cyphellophora* sp. | 0 | 0 | 1 | 0 | 0 | 0 | 0 | 0 | 0 | 0 | 0 | 0 | 0 | 0 | 0 | indol acetic acid |
| CF-166040 | *Nagrajchalara* sp. | 0 | 0 | 1 | 0 | 0 | 0 | 0 | 0 | 0 | 0 | 0 | 0 | 0 | 0 | 0 |  |
| CF-166066 | *Anungitea grevilleae* | 0 | 0 | 1 | 0 | 0 | 0 | 0 | 0 | 0 | 0 | 0 | 0 | 0 | 0 | 0 | cordycerebroside A/B |
| CF-166089 | *Coleophoma* sp. | 0 | 0 | 1 | 0 | 0 | 0 | 0 | 0 | 0 | 0 | 0 | 0 | 0 | 0 | 0 |  |
| CF-166103 | unidentified fungus | 0 | 0 | 1 | 0 | 0 | 0 | 0 | 0 | 0 | 0 | 0 | 0 | 0 | 0 | 0 |  |
| CF-168990 | *Libertasomyces aloeticus* | 0 | 0 | 1 | 0 | 0 | 0 | 0 | 0 | 0 | 0 | 0 | 0 | 0 | 0 | 0 | libertamide |
| CF-164275 | *Fusarium incarnatum-equiseti complex* | 0 | 0 | 0 | 1 | 0 | 0 | 0 | 0 | 0 | 0 | 1 | 0 | 0 | 1 | 0 | equisetin |
| CF-164329 | *Tricladium attenuatum* | 0 | 0 | 0 | 0 | 1 | 0 | 0 | 0 | 0 | 0 | 0 | 0 | 0 | 1 | 0 | virgineone |
| CF-166146 | *Arthrinium* sp. | 0 | 0 | 0 | 0 | 1 | 0 | 0 | 0 | 0 | 0 | 0 | 0 | 0 | 0 | 0 |  |
| CF-166120 | *Neodidymelliopsis* sp. | 0 | 0 | 0 | 0 | 0 | 0 | 0 | 0 | 0 | 1 | 0 | 0 | 0 | 0 | 0 |  |
| CF-166181 | *Keissleriella* sp. | 0 | 0 | 0 | 0 | 0 | 0 | 0 | 0 | 0 | 1 | 0 | 0 | 0 | 0 | 0 |  |
| CF-166129 | *Wallemia mellicola* | 0 | 0 | 0 | 0 | 0 | 0 | 0 | 0 | 0 | 1 | 0 | 0 | 0 | 0 | 0 |  |
| CF-164257 | *Acrostalagmus luteoalbus* | 0 | 0 | 0 | 0 | 0 | 0 | 0 | 0 | 0 | 0 | 1 | 0 | 0 | 0 | 0 | exophilic acid |
| CF-169011 | *Phaeosphaeriaceae* sp. | 0 | 0 | 0 | 0 | 0 | 0 | 0 | 0 | 0 | 0 | 1 | 0 | 0 | 0 | 0 |  |
| CF-164402 | *Dothiora oleae* | 0 | 0 | 0 | 0 | 0 | 0 | 0 | 0 | 0 | 0 | 1 | 0 | 0 | 0 | 0 | coleophomone A/B |
| CF-164274 | *Paraphaeosphaeria verruculosa* | 0 | 0 | 0 | 0 | 0 | 0 | 0 | 0 | 0 | 0 | 1 | 0 | 0 | 0 | 0 |  |
| CF-164414 | *Immersidiscosia eucalypti* | 0 | 0 | 0 | 0 | 0 | 0 | 0 | 0 | 0 | 0 | 1 | 0 | 0 | 0 | 0 | secalonic acid C, violaceol I/II |
| CF-164450 | *Pleomonodictys* sp. | 0 | 0 | 0 | 0 | 0 | 0 | 0 | 0 | 0 | 0 | 1 | 0 | 0 | 0 | 0 |  |
| CF-164479 | *Pyrenochaetopsis leptospora* | 0 | 0 | 0 | 0 | 0 | 0 | 0 | 0 | 0 | 0 | 1 | 0 | 0 | 0 | 0 |  |
| CF-166025 | *Ramusculicola* sp. | 0 | 0 | 0 | 0 | 0 | 0 | 0 | 0 | 0 | 0 | 1 | 0 | 0 | 0 | 0 |  |
| CF-166042 | *Paracamarosporium leucadendri* | 0 | 0 | 0 | 0 | 0 | 0 | 0 | 0 | 0 | 0 | 1 | 0 | 0 | 0 | 0 |  |
| CF-166119 | *Plectania* sp. | 0 | 0 | 0 | 0 | 0 | 0 | 0 | 0 | 0 | 0 | 1 | 0 | 0 | 0 | 0 |  |
| CF-166138 | *Proliferodiscus* sp. | 0 | 0 | 0 | 0 | 0 | 0 | 0 | 0 | 0 | 0 | 1 | 0 | 0 | 0 | 0 |  |
| CF-166147 | *Didymella pinodella* | 0 | 0 | 0 | 0 | 0 | 0 | 0 | 0 | 0 | 0 | 1 | 0 | 0 | 0 | 0 |  |
| CF-166142 | *Paraconiothyrium brasiliense* | 0 | 0 | 0 | 0 | 0 | 0 | 0 | 0 | 0 | 0 | 1 | 0 | 0 | 0 | 0 |  |
| CF-168971 | *Phaeosphaeria* sp. | 0 | 0 | 0 | 0 | 0 | 0 | 0 | 0 | 0 | 0 | 1 | 0 | 0 | 0 | 0 |  |
| CF-169016 | *Pyrenochaeta nobilis* | 0 | 0 | 0 | 0 | 0 | 0 | 0 | 0 | 0 | 0 | 1 | 0 | 0 | 0 | 0 |  |
| CF-169031 | *Phaeosphaeria podocarpi* | 0 | 0 | 0 | 0 | 0 | 0 | 0 | 0 | 0 | 0 | 1 | 0 | 0 | 0 | 0 |  |
| CF-169052 | *Vaginatispora fuckelii* | 0 | 0 | 0 | 0 | 0 | 0 | 0 | 0 | 0 | 0 | 1 | 0 | 0 | 0 | 0 |  |
| CF-164301 | *Serpula himantioides* | 0 | 0 | 0 | 0 | 0 | 0 | 0 | 0 | 0 | 0 | 1 | 0 | 1 | 0 | 0 |  |
| CF-164438 | *Forliomyces* sp. | 0 | 0 | 0 | 0 | 0 | 0 | 0 | 0 | 0 | 0 | 1 | 0 | 1 | 0 | 0 |  |
| CF-164476 | *Desertiserpentica* sp. | 0 | 0 | 0 | 0 | 0 | 0 | 0 | 0 | 0 | 0 | 1 | 0 | 1 | 0 | 0 | illudin M, MDN-0101, N-deoxyakanthomycin |
| CF-164273 | *Cryptocoryneum* sp. | 0 | 0 | 0 | 0 | 0 | 0 | 0 | 0 | 0 | 0 | 1 | 0 | 0 | 1 | 0 | palmarumycins B1, C15, preussomerin B |
| CF-164284 | *Pyrenochaetopsis leptospora* | 0 | 0 | 0 | 0 | 0 | 0 | 0 | 0 | 0 | 0 | 1 | 0 | 0 | 1 | 0 |  |
| CF-164330 | *Angustimassarina* sp. | 0 | 0 | 0 | 0 | 0 | 0 | 0 | 0 | 0 | 0 | 1 | 0 | 0 | 1 | 0 |  |
| CF-166111 | *Acrospermum* sp. | 0 | 0 | 0 | 0 | 0 | 0 | 0 | 0 | 0 | 0 | 1 | 0 | 0 | 0 | 1 | questiomycin A |
| CF-168961 | *Neosetophoma* sp. | 0 | 0 | 0 | 0 | 0 | 0 | 0 | 0 | 0 | 0 | 0 | 1 | 0 | 0 | 1 | 6-(1-hydroxyethyl)-5-hydroxy-2,7-dimethoxy-1,4-naphthoquinone, methyldihydromitorubin |
| CF-164269 | *Pyrenochaetopsis leptospora* | 0 | 0 | 0 | 0 | 0 | 0 | 0 | 0 | 0 | 0 | 0 | 1 | 0 | 0 | 1 | preussomerin L, stemphyltoxin I |
| CF-164238 | *Austroafricana parva* | 0 | 0 | 0 | 0 | 0 | 0 | 0 | 0 | 0 | 0 | 0 | 1 | 0 | 1 | 0 |  |
| CF-164444 | *Fusarium* sp. | 0 | 0 | 0 | 0 | 0 | 0 | 0 | 0 | 0 | 0 | 0 | 1 | 0 | 1 | 0 | 13a-hydroxylucilactaene, lucilactaene |
| CF-166183 | *Curvularia protuberata* | 0 | 0 | 0 | 0 | 0 | 0 | 0 | 0 | 0 | 0 | 0 | 1 | 0 | 1 | 0 | 11-Hydroxycurvularin, curvularin, resorcylide |
| CF-164333 | *Oidiodendron tenuissimum* | 0 | 0 | 0 | 0 | 0 | 0 | 0 | 0 | 0 | 0 | 0 | 1 | 0 | 1 | 0 | deoxydihydrofuscin, infectopyrone |
| CF-164448 | *Pseudocoleophoma* sp. | 0 | 0 | 0 | 0 | 0 | 0 | 0 | 0 | 0 | 0 | 0 | 1 | 0 | 1 | 0 | 7-chloro-6-methoxymellein, dihydrohypnophilin, diorcinol F, preussin G |
| CF-164449 | *Verrucocladosporium carpobroti* | 0 | 0 | 0 | 0 | 0 | 0 | 0 | 0 | 0 | 0 | 0 | 1 | 1 | 0 | 0 |  |
| CF-164321 | *Pleosporales* sp. | 0 | 0 | 0 | 0 | 0 | 0 | 0 | 0 | 0 | 0 | 0 | 1 | 0 | 0 | 0 |  |
| CF-164376 | *Xenopolyscytalum pinea* | 0 | 0 | 0 | 0 | 0 | 0 | 0 | 0 | 0 | 0 | 0 | 1 | 0 | 0 | 0 |  |
| CF-166178 | *Pseudoascochyta* sp. | 0 | 0 | 0 | 0 | 0 | 0 | 0 | 0 | 0 | 0 | 0 | 1 | 0 | 0 | 0 |  |
| CF-164426 | *Stagonospora* sp. | 0 | 0 | 0 | 0 | 0 | 0 | 0 | 0 | 0 | 0 | 0 | 1 | 0 | 0 | 0 | 11,12-hydroxyeudesm-4-en-3-one, dihydrohypnophilin, fiscalins A & C |
| CF-164455 | *Coprinellus micaceus* | 0 | 0 | 0 | 0 | 0 | 0 | 0 | 0 | 0 | 0 | 0 | 1 | 0 | 0 | 0 |  |
| CF-166096 | *Phaeomoniella* sp. | 0 | 0 | 0 | 0 | 0 | 0 | 0 | 0 | 0 | 0 | 0 | 1 | 0 | 0 | 0 | quinolactacin A2 |
| CF-166132 | *Cladophialophora* sp. | 0 | 0 | 0 | 0 | 0 | 0 | 0 | 0 | 0 | 0 | 0 | 1 | 0 | 0 | 0 | radicidin |
| CF-166148 | *Didymella pinodella* | 0 | 0 | 0 | 0 | 0 | 0 | 0 | 0 | 0 | 0 | 0 | 1 | 0 | 0 | 0 |  |
| CF-166185 | *Botryobambusa* sp. | 0 | 0 | 0 | 0 | 0 | 0 | 0 | 0 | 0 | 0 | 0 | 1 | 0 | 0 | 0 |  |
| CF-169051 | *Chromolaenicola* sp. | 0 | 0 | 0 | 0 | 0 | 0 | 0 | 0 | 0 | 0 | 0 | 1 | 0 | 0 | 0 | funicone |
| CF-164349 | *Anteaglonium* sp. | 0 | 0 | 0 | 0 | 0 | 0 | 0 | 0 | 0 | 0 | 0 | 1 | 0 | 0 | 0 | ascochitin, diorcinol F |
| CF-164411 | *Dothiora oleae* | 0 | 0 | 0 | 0 | 0 | 0 | 0 | 0 | 0 | 0 | 0 | 1 | 0 | 0 | 0 |  |
| CF-166060 | *Cladophialophora* sp. | 0 | 0 | 0 | 0 | 0 | 0 | 0 | 0 | 0 | 0 | 0 | 1 | 0 | 0 | 0 | radicinol |
| CF-168985 | *Banksiophoma* sp. | 0 | 0 | 0 | 0 | 0 | 0 | 0 | 0 | 0 | 0 | 0 | 1 | 0 | 0 | 0 |  |
| CF-169002 | *Neophaeomoniella zymoides* | 0 | 0 | 0 | 0 | 0 | 0 | 0 | 0 | 0 | 0 | 0 | 1 | 0 | 0 | 0 |  |
| CF-169033 | *Alfoldia* sp. | 0 | 0 | 0 | 0 | 0 | 0 | 0 | 0 | 0 | 0 | 0 | 1 | 0 | 0 | 0 |  |

**Figure S2.** Distribution of the hit population for each phytopathogen in the different fermentation media and in presence or absence of SAHA.


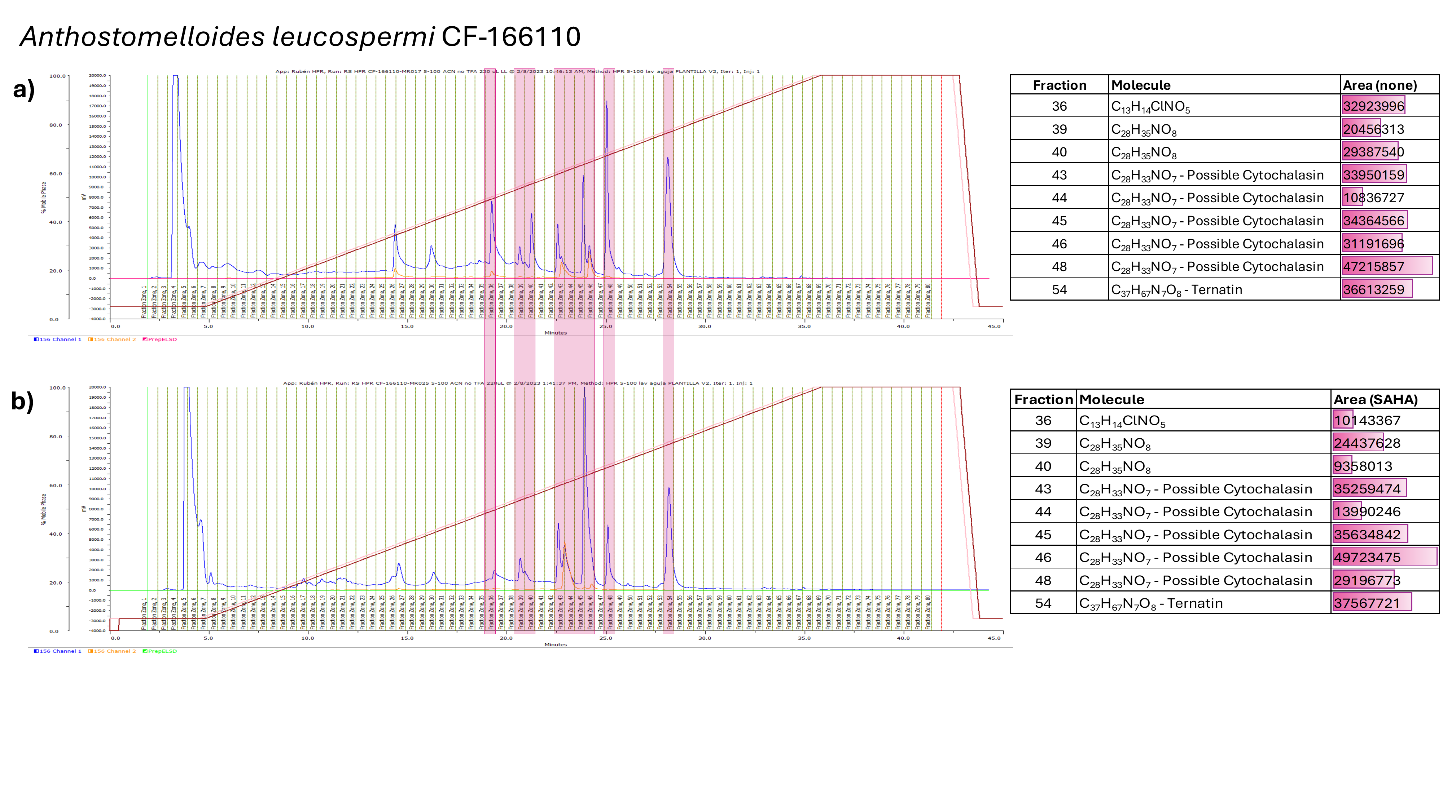


**Figure S3**. Comparative analysis of HPLC profiles of *Anthostomelloides leucospermi* CF-166110 grown in SMK-II in **(a)** absence and **(b)** presence of SAHA. HPLC/UV at 210 nm profiles in blue, 280 nm in orange and B gradient (5-100% ACN/H2O) in red.

**
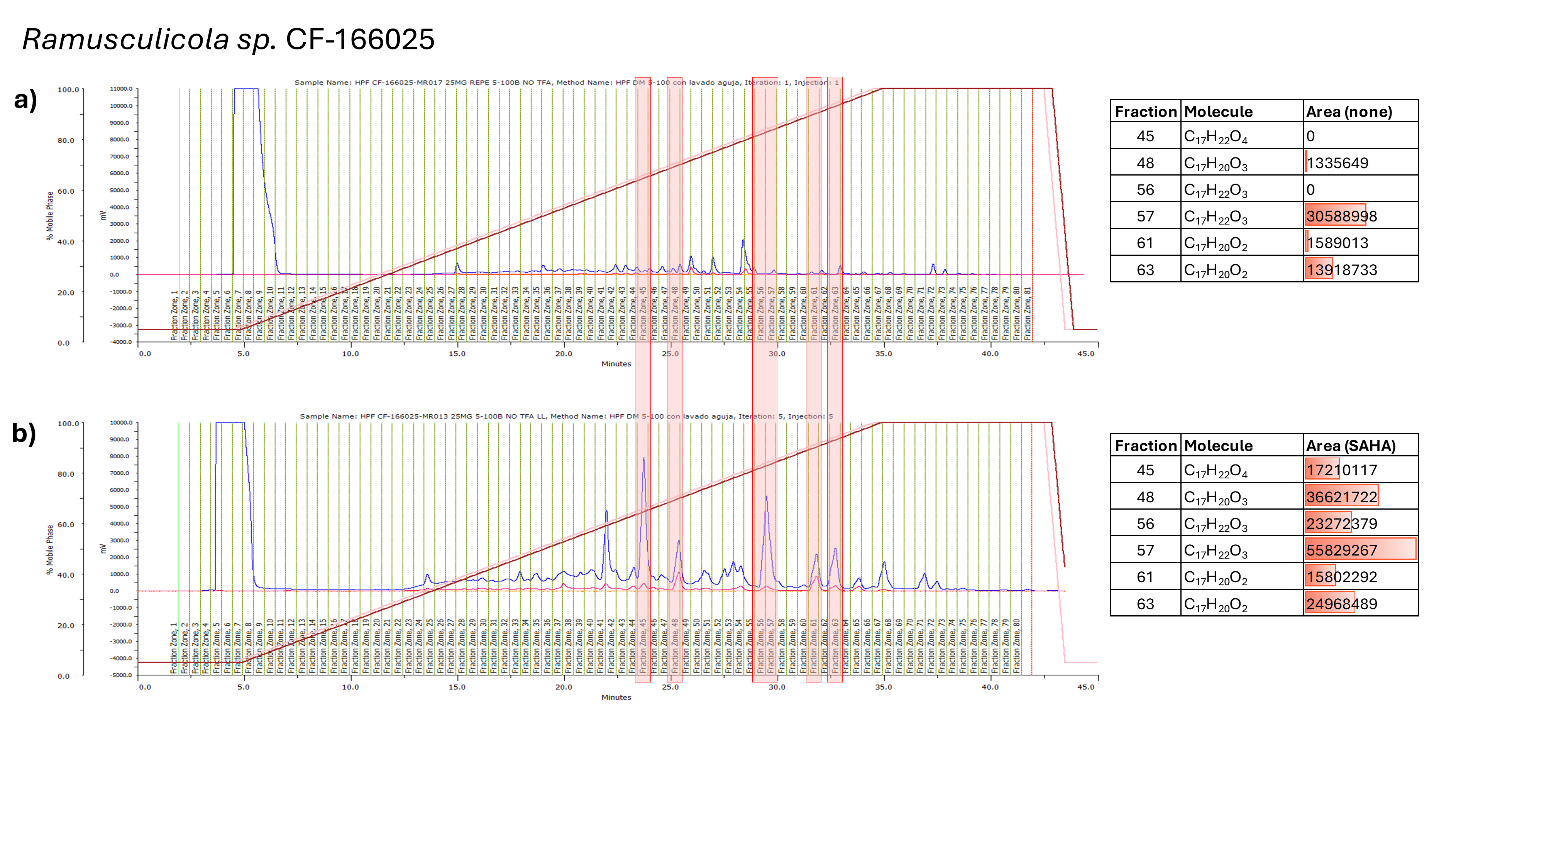
**

**Figure S4**. Comparative analysis of HPLC profiles of *Ramusculicola* sp. CF-166025 grown in SMK-II in **(a)** absence and **(b)** presence of SAHA. HPLC/UV at 210 nm profiles in blue, 280 nm in orange and B gradient (5-100% ACN/H2O) in red.

**Structural elucidation of the new compound *libertamide***

After LC-DAD-HRMS analysis, the target compound could not be dereplicated against our in-house library (Pérez-Victoria et al., 2016) and the molecular formula C16H27NO2 was assigned based on the observed ion [M+H]+ at *m/z* 266.2119 (calcd. for C16H28NO2 + = 266.2115, Dm = 1.7 ppm). Attempts to dereplicate the compound based on its molecular formula and the fungal nature of the producer strain did not retrieve any candidate when querying the Dictionary of Natural Products or the Natural Products Atlas [57-58], suggesting the putative novelty of the target compound. Structure elucidation was then pursued by NMR spectroscopy. A set of 1D (1H and 13C) and 2D (COSY, TOCSY, NOESY, HSQC and HMBC) NMR spectra were recorded for the structural determination. Interpretation of the 1H, 13C, HSQC and HMBC spectra revealed the presence of 2 quaternary carbons (corresponding to ketone and amide carbonyls at δC 209.2 and δC 165.2 respectively), 4 methines (including two olefinic carbons at δC 111.2 and δC 128.9, and two aliphatic methines at δC 43.1 and δC 52.7), 7 aliphatic methylenes in the range δC 23-46 and finally 3 methyls (one as a triplet corresponding to an aliphatic chain end and two as doublets). Detailed analysis of the COSY and TOCSY correlations identified different spin systems which could be connected using the key long-range correlations observed in the HMBC spectrum rendering the final connectivity of the compound (Figure S5). The key NOEs observed between the olefinic proton H-1’ and both H-2 and H-11 (Figure S5) determined the stereochemistry of the tertiary amide bond, placing olefinic C-1’ in a cis display with respect to C-2. Interestingly, EXSY-type cross peaks due to chemical exchange are likewise clearly observed in the NOESY spectrum involving the protons at the five-membered heterocycle, indicating an equilibrium with the minor trans isomer along the amide bond (Figure S6). Such cis/trans amide bond equilibrium (at a ratio ca. 70:30 according to signal integration in the 1H NMR spectrum) resembles that frequently found for proline residues in peptides. Additionally, the NMR spectra likewise showed minor signals of closely related species which must correspond to diastereomers with different relative stereochemistry at the two chiral centers C-2 and C-4. The relative stereochemistry for the main diastereomer of the cis isomer could not be determined though. Epimerization at C-2, surrounded by two carbonyl groups, must proceed easily in solution, explaining the presence of diastereomers as it has been reported for the structurally related scalusamides A−C [59].

**Figure S5**. Key COSY and TOCSY correlations (bold bonds) determined the different spin systems of libertamide. Key HMBC correlations (H to C, blue arrows) connect the different spin systems and render the connectivity of the compound. Key NOEs (dashed red arrows) were observed for the main *cis* isomer along the tertiary amide bond of the compound.

**Figure S6**. Amide bond cis/trans equilibrium in the new compound libertamide.

**Table S3**. NMR data for libertamide(main *cis* isomer) (500 MHz, CD3OD 24 °C)

| **Position** | dC**, type** | d**H, mult. (*J* in Hz)** |
| --- | --- | --- |
| 1 | 165.2, C |  |
| 2 | 52.7, CH | 3.35, m |
| 3 | 209.2, C |  |
| 4 | 43.1, CH | 2.72, dq (13.4, 6.4) |
| 5 | 33.6, CH2 | 1.21, m  1.77, m |
| 6 | 27.7, CH2 | 1.18, m |
| 7 | 29.9, CH2 | 1.18, m |
| 8 | 32.2, CH2 | 1.19, m |
| 9 | 23.1, CH2 | 1.24, m |
| 10 | 14.31, CH3 | 0.88, t (6.9) |
| 11 | 13.0, CH3 | 1.29, d (6.9) |
| 12 | 18.0, CH3 | 0.92, d (6.9) |
| 1’ | 128.9, CH | 6.23, ddd (7.0, 2.5, 2.5) |
| 2’ | 111.2, CH3 | 4.71, dd (7.0, 2.5) |
| 3’ | 28.0, CH2 | 2.03, m  2.00, m |
| 4’ | 45.6, CH2 | 3.62, m  3.59, m |

**Figure S7**. UV (DAD) spectrum of libertamide.

**Figure S8**. ESITOF HRMS spectrum of libertamide.

**Figure S9**. 1H NMR spectrum of libertamide, showing expanded regions (500 MHz, CD3OD 24 °C).

**Figure S10**. 13C NMR spectrum of libertamide, showing expanded regions (125 MHz, CD3OD 24 °C).

**Figure S11**. COSY spectrum of libertamide.

**Figure S12**. TOCSY spectrum of libertamide.

**Figure S13**. NOESY spectrum of libertamide.

**Figure S14**. Multiplicity edited HSQC spectrum of libertamide.

**Figure S15**. HMBC spectrum of libertamide.

**
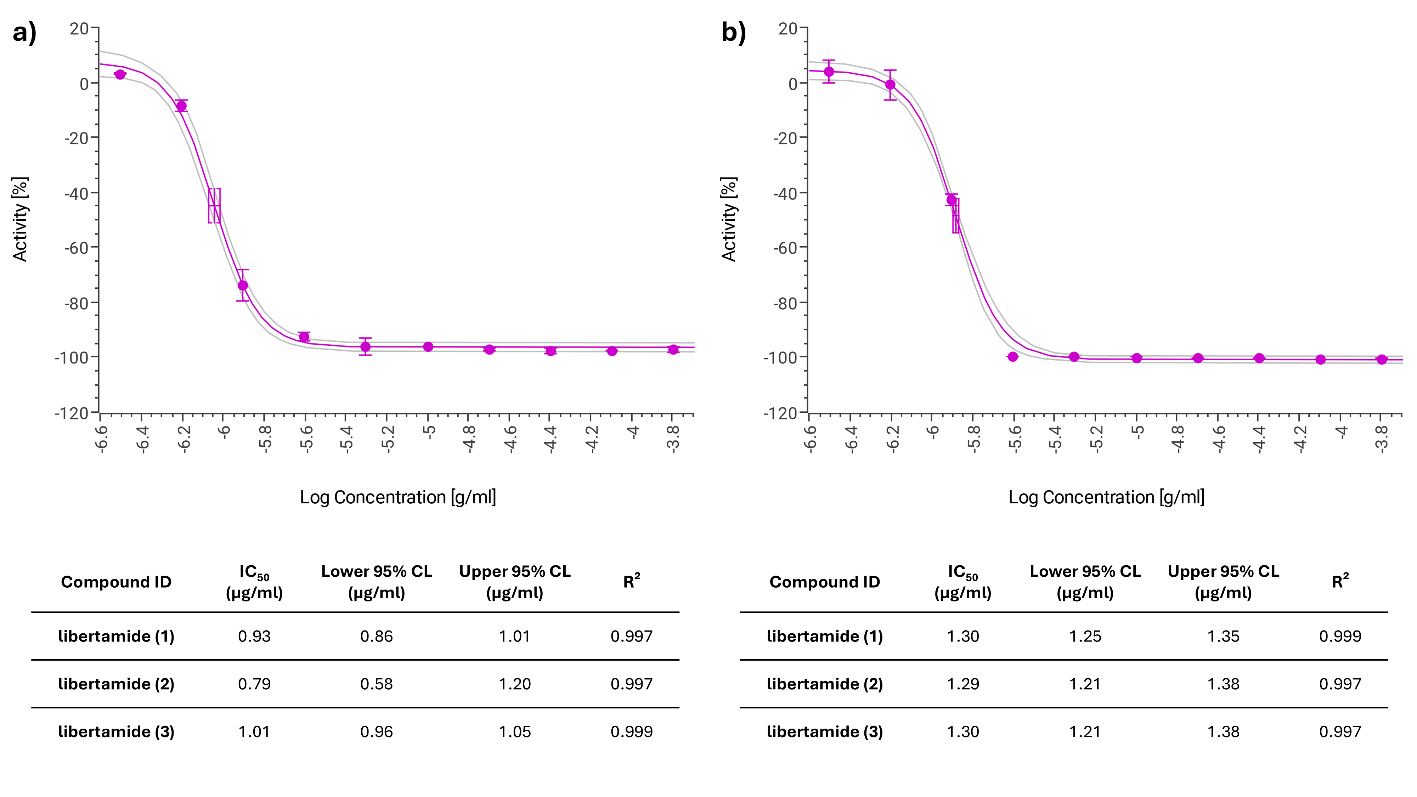
**

**Figure S16.** Dose-response curves of libertamide and IC50 (µg/mL) with their corresponding 95% confidence intervals against *Zymoseptoria tritici* CBS 115943 per triplicate, based on **(a)** absorbance and **(b)** fluorescence data.


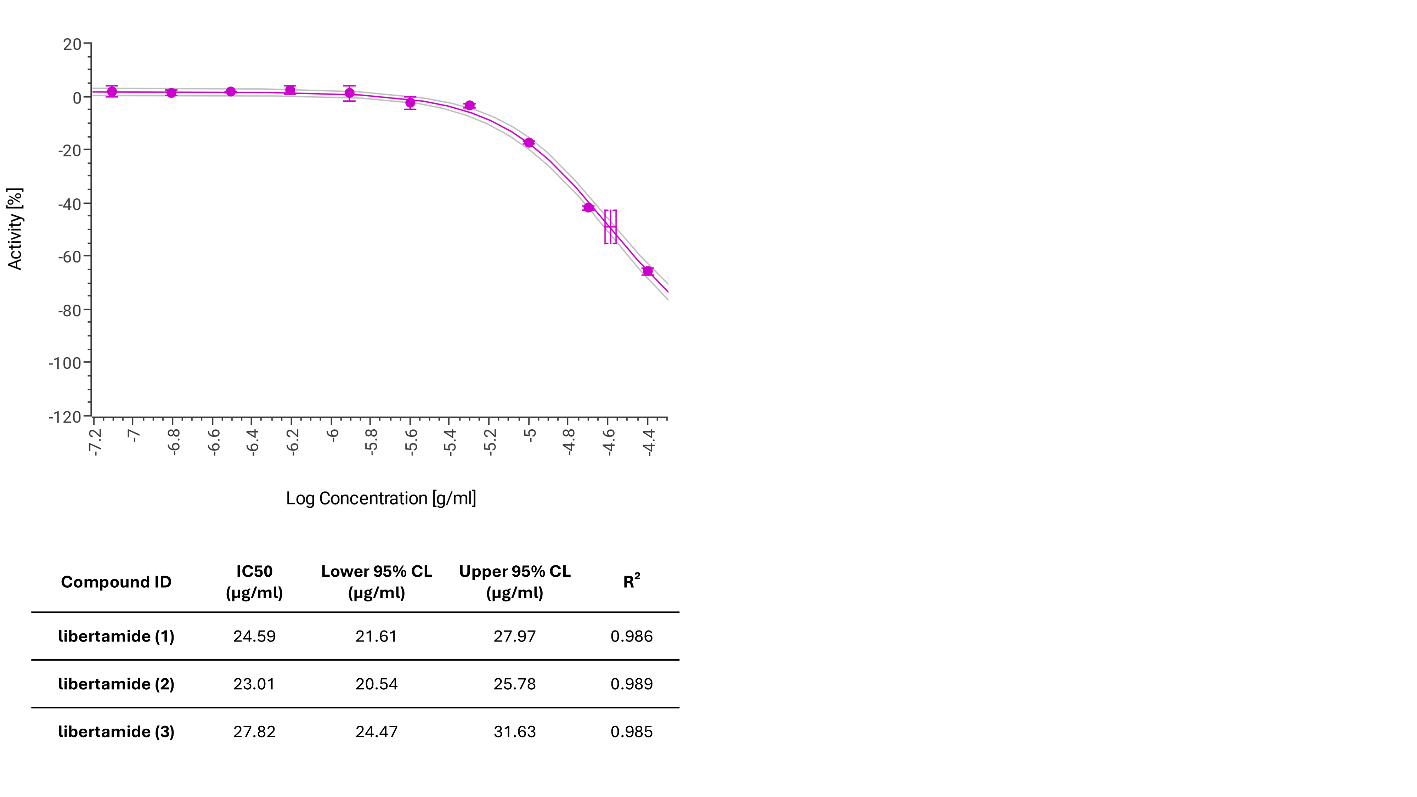


**Figure S17**. Dose-response curves of libertamide and ED50 (µg/mL) with their corresponding 95% confidence intervals for cytotoxicity evaluation in HepG2 cell line per triplicate.
